# Supplementary material for: Towards resolving the transcription factor network controlling myelin gene expression
Source: PubMed Central journal article supplement — Nucleic Acids Res. 2011 Jul 5;39(18):7974–91. doi: 10.1093/nar/gkr326 (PMC3185407; doi:10.1093/nar/gkr326), 2011-07-05
Supplement: supp_gkr326_Myelin_TRN_Fulton_Supplemental_revised.pdf [file supp_gkr326_Myelin_TRN_Fulton_Supplemental_revised.pdf]

## Supplementary Information

### Towards resolving the transcription factor network controlling myelin gene expression

#### Table of Contents:

|                                                                                                                                                                       |           |
|-----------------------------------------------------------------------------------------------------------------------------------------------------------------------|-----------|
| <b>Tables</b> .....                                                                                                                                                   | <b>3</b>  |
| <b>Table S1.</b> Myelin gene enhancer genomic coordinates.....                                                                                                        | 3         |
| <b>Table S2.</b> Myelin gene-associated enhancer sequences.....                                                                                                       | 4         |
| <b>Table S3.</b> PCR primers used in enhancer sequence amplification (restrictions sites are noted in bold).....                                                      | 6         |
| <b>Table S4.</b> List of muscle reference collection genes.....                                                                                                       | 7         |
| <b>Table S5.</b> Mouse skeletal muscle enhancer genomic coordinates.....                                                                                              | 9         |
| <b>Table S6.</b> Mouse skeletal reference collection with 25 random genes.....                                                                                        | 10        |
| <b>Table S7.</b> Parameters used in the validation of the promoter CRM analyses method.....                                                                           | 13        |
| <b>Table S8.</b> Mouse myelin gene-associated enhancer genomic coordinates.....                                                                                       | 14        |
| <b>Table S9.</b> Positive and negative groupings for oligodendrocyte enhancers.....                                                                                   | 15        |
| <b>Table S10.</b> Gene Ontology molecular function term enrichment analysis of optic nerve expression data.....                                                       | 16        |
| <b>Table S11.</b> Gene Ontology cellular component term enrichment analysis of optic nerve expression data.....                                                       | 19        |
| <b>Table S12.</b> Validation of promoter CRM analyses method using the skeletal muscle reference collection and a full ortholog background.....                       | 20        |
| <b>Table S13.</b> Validation of promoter CRM analyses method using the muscle reference collection and random background samples.....                                 | 23        |
| <b>Table S14.</b> Validation of promoter CRM analyses method using the muscle reference collection with 25 randomly selected genes and random background samples..... | 25        |
| <b>Table S15.</b> Vertebrate TF profile clustering and class label assignment.....                                                                                    | 27        |
| <b>Figures</b> .....                                                                                                                                                  | <b>30</b> |
| <b>Figure S1.</b> Overview of methodology.....                                                                                                                        | 30        |
| <b>Figure S2.</b> Genomic context for myelin gene-associated enhancer regions.....                                                                                    | 31        |
| <b>Figure S3.</b> Logos of transcription factor binding site profiles added to the Jaspar database for the promoter analyses.....                                     | 33        |
| <b>Figure S4.</b> Reporter gene activity in spinal cord sections for <i>Cldn11</i> , <i>Gjb1</i> , <i>Pou3f1</i> , and <i>Mal</i> constructs.....                     | 34        |
| <b>Figure S5.</b> Wholemout staining of mouse spinal cords for pre-weaning and mature developmental stages.....                                                       | 35        |
| <b>Figure S6.</b> Reporter gene activity in whole brain sections for <i>Ernm</i> , <i>Olig1</i> , and <i>Olig2</i> constructs.....                                    | 36        |
| <b>Figure S7.</b> Reporter gene activity in spinal cord sections for <i>Ernm</i> , <i>Olig1</i> , and <i>Olig2</i> constructs.....                                    | 37        |
| <b>Figure S8.</b> Characterization of cell populations expressing the <i>Gjb1</i> , <i>Cldn11</i> , <i>Pou3f1</i> and <i>Mal</i> constructs and MBP marker.....       | 38        |

|                                                                                                                                                                    |           |
|--------------------------------------------------------------------------------------------------------------------------------------------------------------------|-----------|
| <b>Figure S9.</b> Characterization of cell populations expressing the <i>Gjb1</i> , <i>Cldn11</i> , <i>Pou3f1</i> and <i>Mal</i> constructs and PDGFRA marker..... | 40        |
| <b>Figure S10.</b> Evaluation of sequence conservation flanking transcription factor binding sites.....                                                            | 41        |
| <b>Figure S11.</b> Myelin gene TRN model validation study 1.....                                                                                                   | 42        |
| <b>Figure S12.</b> Myelin gene TRN model validation study 2.....                                                                                                   | 43        |
| <b>Supplemental references</b> .....                                                                                                                               | <b>44</b> |

## Tables

**Table S1.** Myelin gene enhancer genomic coordinates.

| Gene Enhancers | Mouse Assembly 36 Feb 2006 (mm8) |                 |               |
|----------------|----------------------------------|-----------------|---------------|
|                | Chr                              | From Coordinate | To Coordinate |
| <i>Cldn11</i>  | 3                                | 31357206        | 31357836      |
| <i>Cnp</i>     | 11                               | 100391366       | 100392107     |
| <i>Ernm</i>    | 2                                | 57868209        | 57868795      |
| <i>Gjb1</i>    | X                                | 97586055        | 97586691      |
| <i>Mal</i>     | 2                                | 127318715       | 127319393     |
| <i>Olig1</i>   | 16                               | 91189705        | 91190805      |
| <i>Olig2</i>   | 16                               | 91097897        | 91098790      |
| <i>Pou3fl</i>  | 4                                | 124169971       | 124170620     |

**Table S2.** Myelin gene-associated enhancer sequences.

| Gene Enhancers | Construct Sequences                                                                                                                                                                                                                                                                                                                                                                                                                                                                                                                                                                                                                                                                                                                                                                                                                          |
|----------------|----------------------------------------------------------------------------------------------------------------------------------------------------------------------------------------------------------------------------------------------------------------------------------------------------------------------------------------------------------------------------------------------------------------------------------------------------------------------------------------------------------------------------------------------------------------------------------------------------------------------------------------------------------------------------------------------------------------------------------------------------------------------------------------------------------------------------------------------|
| <i>Cldn11</i>  | <p>TGTCACCACTCCTCTGAAGCTACCCAGGCATGATTTGTGTCTCCACGGCCCTCCAGGAA<br/> TGGCTTCGACTTCCCACATTTTTTTCATTTCTACAGAGGGGCATGAAGCAGTGACTAGTCCCC<br/> CTGTCTCCACTCACCTTCCAGACACGGCCACGGTGCCTGAGCTCCGGGTATACACGAGCT<br/> AAAGAAACCGAGATTCCCTCAAGAGCTGCTATTCAAGCCACGAGCAGCATGTGCCAACATT<br/> CCTTCCACAATCCCGCTTCAAGTCCCATGAAGCTGCACATCTGGCTGTACACACTCTTTTG<br/> TGGGGCCATCTCAAAGGCTGTCTGATGCTGCCTCTCCCCAGGGCCGGTCCCACAGTGGCC<br/> TCCCTGTCTCCTAGCATGTGATGTCATGAGCATGAATGTCCTGCCAAACATTTAAGATGC<br/> GACAGCTCATTGTGTACATTGTATAGAGAAACTGCTGGGCAGATCAGTTCTAATTAATA<br/> CAAGAAAAGAGGCAGGCCAGGACAGAGCCGGACCTTGTCTATTGTTACCCCAAGCCACC<br/> GAGGCAGCACAAAGTGTGTAACGTGCACTCTCCAAGCTCACACCCTTCTCTTTTGTTCAG<br/> TCTTGTCCTCCAGCATCTCAA</p>                                                                                                                           |
| <i>Cnp</i>     | <p>GCTGGGTGTGAAGGTAGAGGGAATCTTTCTGAAGCTACCTAACCTCTTAGTCTCTGGCTCC<br/> AAGGATCACTCTCTGCTCCCCCTCAGAACACCTTGGTGACAGGGCACGCAAGGGCAGCAA<br/> GTGCTGTGGCTCCCTGTCAGCCCTAACTTATATATTCTTGGCACCTCTTAAGGATGTCCTG<br/> TTTGGAGGCTGGGGCTCTATGTATGGGCAAAGCCACAGCTGCCTTGGCTCTCTTGAGTGT<br/> GCAGAGGAGGGTGAGGGCAGGGGAGGGTGACCCAAAGACCGCCTCCCTCCACCCAACAA<br/> TGGCACCAACAGATAATACTCTTGTCTGGGTATAGGGGGACAATGGTCCCACAGAGGG<br/> CTGGTGGGGGGCAGGGCAGGAGGGCACTGGACAAAGGGCATATTCACAACCACCTCTCC<br/> TCTGCTCTCAGTGCAGGGGGCTCCCCCAATCTGTAGGATTAGGGCACAGGGCACCTGTAT<br/> TCAGAGATCTGTGCCCTTATTCTGCTGTGTGTTAGCAGCACCTCTCTGACAAAAACAAGA<br/> CATAGCGTTTCAGTTGTCATCTACAACGGCTTCCGCCCCTGAGAATTTAGCTGGCTTCTGG<br/> CTTCTCTATAGCCTTGTGCAGGAACCCACTCCCAGCGCGGGCTCCACAACAGCCCTGCACT<br/> CTCTGGTGTACCCAGACCCATTGCCAGCTGGTGTGCGCAAGGAGCATCGACTTTCACTT<br/> CCCTGCGGGCGATA</p> |
| <i>Ernn</i>    | <p>TAATGGGTAGGGTGGGTGTCTGTAGACCTGGGGGGACTGGAAAATCAGCTTCTGAGAGC<br/> ACACTATGAAATCAGTTGCCAAAGCCGTTTACAATCAAGTTGTCATGTTTACAGGTCCTTG<br/> AAAAGCTGGTTTTAGTCTTTAATAGATGAGAAATGATGCCATTGTCTCCTACAAAATAGCT<br/> GAGGTTTTACTCGAACCAAATCTGTTTCGGAAATGTTAAGCTGGTTACACAGAACTAATGTG<br/> CCTCAAGGTGGTCATTCTCTCTGGATTAAGCCTGGGAACAATTGTGGCTCCTGTTACAAG<br/> GAAAATTACAATGGGCCATTATGGAGAGGGACAAAAATCTCTGTTCCAGAGGGGGACTG<br/> ACAAGCGGCAAGTCCCCCTTTCATGCTAACACAAAAAGCCTGATTGCTTCAGATTGCTTGT<br/> TTATGCAAAATGAAGGCAACACTAATTCTGAGACTGGAGCTGCGAGGTGGTGGGGATGTT<br/> CTGATTGGCTGGGTTTTGCTCCCGGGCTGGTTACCAAACCTGACAAACCCTATCATATTCA<br/> TTCTGAGCCCTGAAAACCTTTCGGAGGAATCTTGCTATTGC</p>                                                                                                                                                                       |
| <i>Gjb1</i>    | <p>TCCTCTTGAGTCCCTTTCTTACCAGGCCTATCTTGTCTGCTATTAGCCTGTTCTTCGTGCA<br/> CCACCACCACCACCCGCCCCAGCTCCTTTACACCTGACTTATGGCAAACCCAGATAGCCC<br/> GGTTACCTCGGGGAGCGCCTATCCTTGAGGCCACCCAGACAGCTCCCCTATGGTCTCATGT<br/> CTGTGTAGGGGGAGTGGTCCCTGTGGTTCGCGCCTGCGTCCCAATTCATCGCCTCCCGGTGC<br/> TAGAGAGTCATATGCTGCTTTATACCCAGTGTCTGTACAATGGGACCTTTGTGGGGCGCTG<br/> AACAAACCCCTTTAGAATTCAGATCAAACGCCCTGACTTCCGCCCACCCTACACACAGAGC<br/> ACTTGTGTCACGCGCCGACACCCAGCCTGCACCCACCTGTTCTGTGCCCCCGCCGTTCCA<br/> TCGCCGCACCCGCCCCATGGCCCCACCAGAATAATGGCTCTGGGGGAGGGAGATAGAACA<br/> CAGACAGGTGCAAGTAAGCCAGGACCCAGGGAATCAGGGTCTCTGGACTAAGGCCCTTC<br/> CCCTATATTCTACCAGAAACGGGGTCAGCAGCAGGTTTTCTAGGGGTAGGTCCCTTTCCAG<br/> GTATGGATGAGCCAGAAGAGAGGAAAC</p>                                                                                                                 |
| <i>Mal</i>     | <p>CTGCCTTTGTTTCTTTCTGGTGATCTTCCCCACGAAGGGAGGGTATATGAAAGAGGCTT<br/> CTTCATGTATAGCTCTTTTCCCCTGGAAGCCAACCTTAAACACCTCATTCTGCACACAGTAG<br/> GTCCAATGAGACCATTCTTTCATAGACCCTTCACTAGGAGCTGAGCCTTCTTATAAAGGA<br/> GTCTGTGGGACCCCCCAGGAATCAGCATGTCTTTGACACAGCAGTCCCAACGGGTGCATT<br/> GAAGGCCTCCCTACACATGGGCCTTAAAGAGACAGTAAAGGGTTTCGCACTGCCAGCCGTG<br/> GGCTGGAGCAAGCATGCCTTTGGGGCTATAACAAGGCCTGTTGTTCCAGAATCAATTGGG<br/> GCCACTGTGGGGTCACAATGAAGGCCTTTCAAAGAGACAAAGCGCCTCTGGCCTGGCTAA<br/> GTGTCCCTGCACACGTGGGCATCTGCCAGAACATTTAAAATAACACGATTTGAAAAAAC<br/> AGATTTAAAGTGTACAATCTAGTGGCCTTTGTTCTGTGTCTACCATGTGCAGTGGCCTTTGT<br/> TCTGTGTCCACCACATGCAGTGTGGTGGATCAGAGCTGGGTGTGGGGAGGAGGACACTA<br/> GAGCTCCAGCTGGGACCTCTTCTCTGTCTTAGGTAGGAAACTGGGTATCTACACAGTT<br/> CCAGGCTCAC</p>                                                                      |



**Table S2.** Myelin gene-associated enhancer sequences (continued).

| Gene Enhancers | Construct Sequences                                                                                                                                                                                                                                                                                                                                                                                                                                                                                                                                                                                                                                                                                                                                                                                                                                                                                                                                                                                                                                                                                                                                                                                                                            |
|----------------|------------------------------------------------------------------------------------------------------------------------------------------------------------------------------------------------------------------------------------------------------------------------------------------------------------------------------------------------------------------------------------------------------------------------------------------------------------------------------------------------------------------------------------------------------------------------------------------------------------------------------------------------------------------------------------------------------------------------------------------------------------------------------------------------------------------------------------------------------------------------------------------------------------------------------------------------------------------------------------------------------------------------------------------------------------------------------------------------------------------------------------------------------------------------------------------------------------------------------------------------|
| <i>Olig1</i>   | <p>CTGCTGAAACACTCCGCTCTTCTGGAGACTGCAGGAGGCTCGGATGGGGTGGTTGGGGC<br/> AGAGCACTGGGCATTAAGCTCCATCCTGGCTTACATAAAGGAAGAAAACCTCAAAACGCA<br/> GGGCGGGGGTGGGGGGTGCAACTAAATTTAATTGGCTAGAAAGCAGGATTCCTGGGG<br/> TCTCCGCTTTCCAGCTTCCAGAGACGGCTTTAAGAAGGGATTCTTCTCCGCCTCCAGCAC<br/> CAAAAAGAAAGGGTTGAGCTGGGTGGTAATCCAGGTTTGGTCTGGCCAAGACAAATGAC<br/> ATACAGAACATGCAGTCTCTTGCACACGGCATGTGCTTTCATGGAAGTGGAAGGGGAGA<br/> GAAGAAGGTGGGTAAAGGGGTGTAGAAAGGGGGCACTAAAAACAACCTTGCTGTTTGCATA<br/> TGGTTCGGGCGAAATCTGTTTTGTCCCCGTACTGTGCAGAGTGCAGTAGTGGGCACCGTG<br/> TCGTGACAAGTTCTTTCTTTCTTTCTTTCTTTTTCTTTTTCTTTTTTTTTTTTTTAAGTTAA<br/> GCTAAGCTCACCCGAGCCTCGGCCCCCGAGGTCCTGCAGCTTTAATTGTGTTCAAGTATG<br/> ATCTGGCGAACAATATGTCTTGATAAATGTGAATGGCGATCCCGCGCGGGCTCCCCTTGG<br/> CATTGCCGCAAAGCCAGGCCTCGCTTGTAGTAACCCGTTTCAGGAATGTGGGTTAATTCGGC<br/> CGACCTTTTTACCCCAAGCTCTGTTTTGTGAGGTTGGCAGAACTGACACGTTTTCTT<br/> TTGCTTAATTAAGTTGTTCAAGTAGAAGGCTGGTCAAACAGTTGCATCTACGTGGGGAGTCT<br/> GGGGATGCGCAGAAAGCCGTGGGCGTTTCCAACATAAAAAGGGGGATTCTGTTATTGTTT<br/> GGGTGTAGACGGGTCATTTTTCAAAGTATTGTCTGCTGAGTGACCACAACCTTGCGCAG<br/> AGCCCTGAAAGGACATTAAGCTGCTTAAACACAACCACCTTGGGCTCCAAAGTGTGTTTC<br/> TAAAAAGGAGAAAGAGATGCAGGGCGCAAGAGAAAAGAACTAGGGCGATAGGAAGCAGTG<br/> GCGTTT</p> |
| <i>Olig2</i>   | <p>GGATTGGGAAGGCATCTTGCCTCCAGCCTGGCATTATTAAGAATTAATAAATAACGAAG<br/> CCGGCAGAGATACGGAGGGAGGCTAATTGGAAACCTGGAATGATCGCTTTAATTTGTTG<br/> ACAATGTGGTGTTTGCAGGGGGAGGGATTGAGGGAGCCAAGGCACAGGATGGCCGTGCTT<br/> GTCTGGGCCTTGATTAATGGAGTAGCAGCTGAATTACGTGTTCAAGAGCGAACAACATCAA<br/> GACCATCATCTGAGATCTCATTTCTTCTATTCCACGGTGTCAAAGGTGGCTGCAAAATATATC<br/> CAGCACTTTCTGGGTGGCATTGTTTAGGATGCTGGCCCCAGCAGATGGCCCCAAAATGTAC<br/> CTCAGCCTGATGGAGCAGGGAGGGACCACATGGGATGGCATGTCTCCTCATTAGCAAACA<br/> GAAAAGAAGGGGGAAAAAATAGAAAGCAGGATGAGAAAGGAGAGAGATGAAAAGAATA<br/> CAAAAGACATTTACATATTTACATTGTCTCCCTCGCATTTAAAATTTCCCTTAGCCGAAG<br/> TGTCAGTGGGCTTCTTCTTCTGTTTGTGTGTTTACTTGTCATAAATAGATTATGGTAATCA<br/> GGCACATAAATGCACGCAACTGTTAATTATGGCATTTTAATCACGGACTTTTTCACTGGAAG<br/> CCTTCATTAGGATTCCCATAATCTTACTTGTTAGTGTAAACAAACAGTAATAAATGCCAAAG<br/> AGCTTGATTAAAGGCAGGGGCCTATCAGGCTTTAAAAGAGGAATATGGAAATGTTGTTGA<br/> ATCTCTGCATTACTTATTGAAATGTACATAAACAGTTTCGAGATTCTAAATAGCTTACTCAT<br/> TATCCAGAGAGGGACGCGGGCAACCTGAGCCCAGTAATGATGT</p>                                                                                                                                                                                                                         |
| <i>Pou3fl</i>  | <p>CTCGAGCTGCTCAGCCCCCTCCCCTGACACAAACAATCCTCAGTTACCTCCCCCTCCTGCT<br/> CCCCAGAATCTGGGCACAGCTGGAGCCTGCTATGCCCTAGCCACCCCATGAATCACCGCTC<br/> TATGGTCCACGGGGGAGTGGTCCAGGGAGCATCCTACGCTTGCTCGGGAGGAGTGAGGGC<br/> CAGAACTGCAGCCCTCAAGCAGGCAGTGTCCACAGAAACAATGGGGGCTGTGGCTAACA<br/> GGCGAATGCAGCTATTGTCTGCTGCCCCCAACCCCAAGGCCCCAGGTCCCAGGGC<br/> AGGCGGCCTGGCGTGAATCAGTGCCTCAGACTCTCGTGTACCAGGGCTGGGCACACATGA<br/> CCTGCTGCTTACCTTCTCTGGGTAAGCAGGAGGGTAGGCTGATGGGCCAGACCCCCACCTC<br/> TACAGCCAACCTCACAAAGGATCCTCCTGCACAGAATGAGAAGCGAGATGGGACCCACGG<br/> GAGTAAAGGCAACCTCCAACCTACCCATCCCTAGGATGCTTGAGACCAGCAGCTGAGA<br/> CCCAAGCTATACATCACAGTGGGGAGGAGACCACATTAGAATAATGCAGGATTAGAGTGG<br/> GGTTGCTATAGCGACGTATTAGGGCAATACATCTAGGGAGCCCCA</p>                                                                                                                                                                                                                                                                                                                                                                                                                                                                                                            |

**Table S3.** PCR primers used in enhancer sequence amplification (restrictions sites are noted in bold).

| Gene Enhancers | Primer 1 / Primer 2                                                                           |
|----------------|-----------------------------------------------------------------------------------------------|
| <i>Cldn11</i>  | ATG <b>CGGCGCGC</b> CTGTCACCACTCCTCTGAAGCTACC<br>ATGC <b>CTCGAG</b> TTGGAGATGCTGGGGACAAGAC    |
| <i>Cnp</i>     | ATGC <b>CTCGAGG</b> CTGGGTTGTAAGGTAGAGGGAATC<br>ATG <b>CGGCGCGC</b> CTATCGCCGCAGGGAAGTGAAAGTC |
| <i>Ermn</i>    | ATG <b>CGGCGCGC</b> CCTAATGGGTAGGGTGGGTGTCTG<br>ATGC <b>CTCGAGG</b> CAATAGCAAGATTCCTCCGAAAG   |
| <i>Gjb1</i>    | ATG <b>CGGCGCGC</b> CTCCTCTTGAGTCCCTTTCTTCACC<br>ATGC <b>CTCGAGG</b> TTTCCTCTCTTCTGGCTCATCC   |
| <i>Mal</i>     | ATG <b>CGGCGCGC</b> CCCTGCCTTTGTTTCTTTCTGGTG<br>ATGC <b>CTCGAGG</b> TGAGCCTGGAAGTGTGTAGATACC  |
| <i>Olig1</i>   | ATG <b>CGGCGCGC</b> CCCTGCTGAAACACTCCGCTCTTC<br>ATGC <b>CTCGAG</b> AAACGCCACTGCTTCCTATCGC     |
| <i>Olig2</i>   | ATG <b>CGGCGCGC</b> CCGGATTGGGAAGGCATCTTGC<br>ATGC <b>CTCGAG</b> ACATCATTACTGGGCTCAGGT        |
| <i>Pou3f1</i>  | ATGC <b>CTCGAG</b> TTCTTTGACAATGGGGCTTCTCT<br>ATG <b>CGGCGCGC</b> CTGGGGCTCCCTAGATGTATTGC     |

**Table S4.** List of muscle reference collection genes.

| Ensembl Gene ID | HGNC Symbol | Ensembl Description                                                                                                                                                                    |
|-----------------|-------------|----------------------------------------------------------------------------------------------------------------------------------------------------------------------------------------|
| ENSG00000143632 | ACTA1       | Actin, alpha skeletal muscle (Alpha-actin-1) [Source:UniProtKB/Swiss-Prot;Acc:P68133]                                                                                                  |
| ENSG00000159251 | ACTC1       | Actin, alpha, cardiac muscle 1 [Source:HGNC Symbol;Acc:143]                                                                                                                            |
| ENSG00000149925 | ALDOA       | Fructose-bisphosphate aldolase A (EC 4.1.2.13)(Muscle-type aldolase)(Lung cancer antigen NY-LU-1) [Source:UniProtKB/Swiss-Prot;Acc:P04075]                                             |
| ENSG00000138435 | CHRNA1      | Acetylcholine receptor subunit alpha Precursor [Source:UniProtKB/Swiss-Prot;Acc:P02708]                                                                                                |
| ENSG00000170175 | CHRNB1      | Acetylcholine receptor subunit beta Precursor [Source:UniProtKB/Swiss-Prot;Acc:P11230]                                                                                                 |
| ENSG00000135902 | CHRND       | Acetylcholine receptor subunit delta Precursor [Source:UniProtKB/Swiss-Prot;Acc:Q07001]                                                                                                |
| ENSG00000108556 | CHRNE       | Acetylcholine receptor subunit epsilon Precursor [Source:UniProtKB/Swiss-Prot;Acc:Q04844]                                                                                              |
| ENSG00000196811 | CHRNG       | Acetylcholine receptor subunit gamma Precursor [Source:UniProtKB/Swiss-Prot;Acc:P07510]                                                                                                |
| ENSG00000104879 | CKM         | Creatine kinase M-type (EC 2.7.3.2)(Creatine kinase M chain)(M-CK) [Source:UniProtKB/Swiss-Prot;Acc:P06732]                                                                            |
| ENSG00000175084 | DES         | Desmin [Source:UniProtKB/Swiss-Prot;Acc:P17661]                                                                                                                                        |
| ENSG00000198947 | DMD         | Dystrophin [Source:UniProtKB/Swiss-Prot;Acc:P11532]                                                                                                                                    |
| ENSG00000198125 | MB          | Myoglobin [Source:UniProtKB/Swiss-Prot;Acc:P02144]                                                                                                                                     |
| ENSG00000081189 | MEF2C       | Myocyte-specific enhancer factor 2C [Source:UniProtKB/Swiss-Prot;Acc:Q06413]                                                                                                           |
| ENSG00000111046 | MYF6        | Myogenic factor 6 (Myf-6) [Source:UniProtKB/Swiss-Prot;Acc:P23409]                                                                                                                     |
| ENSG00000109063 | MYH3        | Myosin-3 (Myosin heavy chain 3)(Myosin heavy chain, fast skeletal muscle, embryonic)(Muscle embryonic myosin heavy chain)(SMHCE) [Source:UniProtKB/Swiss-Prot;Acc:P11055]              |
| ENSG00000141048 | MYH4        | Myosin-4 (Myosin heavy chain 4)(Myosin heavy chain 2b)(MyHC-2b)(Myosin heavy chain IIb)(MyHC-IIb)(Myosin heavy chain, skeletal muscle, fetal) [Source:UniProtKB/Swiss-Prot;Acc:Q9Y623] |
| ENSG00000197616 | MYH6        | Myosin-6 (Myosin heavy chain 6)(Myosin heavy chain, cardiac muscle alpha isoform)(MyHC-alpha) [Source:UniProtKB/Swiss-Prot;Acc:P13533]                                                 |
| ENSG00000092054 | MYH7        | Myosin-7 (Myosin heavy chain 7)(Myosin heavy chain, cardiac muscle beta isoform)(MyHC-beta)(Myosin heavy chain slow isoform)(MyHC-slow) [Source:UniProtKB/Swiss-Prot;Acc:P12883]       |
| ENSG00000168530 | MYL1        | Myosin light chain 1, skeletal muscle isoform (MLC1F)(A1 catalytic)(Alkali myosin light chain 1) [Source:UniProtKB/Swiss-Prot;Acc:P05976]                                              |
| ENSG00000198336 | MYL4        | Myosin light chain 4 (Myosin light chain 1, embryonic muscle/atrial isoform)(Myosin light chain alkali, GT-1 isoform) [Source:UniProtKB/Swiss-Prot;Acc:P12829]                         |
| ENSG00000129152 | MYOD1       | Myoblast determination protein 1 (Myogenic factor 3)(Myf-3) [Source:UniProtKB/Swiss-Prot;Acc:P15172]                                                                                   |
| ENSG00000122180 | MYOG        | Myogenin (Myogenic factor 4)(Myf-4) [Source:UniProtKB/Swiss-Prot;Acc:P15173]                                                                                                           |

**Table S4.** List of muscle reference collection genes (continued).

| Ensembl Gene ID | HGNC Symbol | Ensembl Description                                                                                                                                                                                                                                |
|-----------------|-------------|----------------------------------------------------------------------------------------------------------------------------------------------------------------------------------------------------------------------------------------------------|
| ENSG00000007314 | SCN4A       | Sodium channel protein type 4 subunit alpha (Sodium channel protein type IV subunit alpha)(Voltage-gated sodium channel subunit alpha Nav1.4)(Sodium channel protein skeletal muscle subunit alpha)(SkM1) [Source:UniProtKB/Swiss-Prot;Acc:P35499] |
| ENSG00000181856 | SLC2A4      | Solute carrier family 2, facilitated glucose transporter member 4 (Glucose transporter type 4, insulin-responsive)(GLUT-4) [Source:UniProtKB/Swiss-Prot;Acc:P14672]                                                                                |
| ENSG00000114854 | TNNC1       | Troponin C, slow skeletal and cardiac muscles (TN-C) [Source:UniProtKB/Swiss-Prot;Acc:P63316]                                                                                                                                                      |
| ENSG00000159173 | TNNI1       | Troponin I, slow skeletal muscle (Troponin I, slow-twitch isoform) [Source:UniProtKB/Swiss-Prot;Acc:P19237]                                                                                                                                        |

**Table S5.** Mouse skeletal muscle enhancer genomic coordinates.

| Gene Enhancers | Human<br>Ensembl Gene Id | Mouse Assembly 36 Feb 2006 (mm8) |                    |                  |
|----------------|--------------------------|----------------------------------|--------------------|------------------|
|                |                          | Chr                              | From<br>Coordinate | To<br>Coordinate |
| DMD_MOUSE      | ENSG00000198947          | X                                | 79208550           | 79208871         |
| MYG_MOUSE      | ENSG00000198125          | 15                               | 76849839           | 76850250         |
| MEF2C_MOUSE    | ENSG00000081189          | 13                               | 83981341           | 83981501         |
| MYH3_MOUSE     | ENSG00000125414          | 11                               | 67053712           | 7053977          |
| ACHA_MOUSE     | ENSG00000138435          | 2                                | 73381070           | 73381369         |
| ACHB_MOUSE     | ENSG00000170175          | 11                               | 69612003           | 69612304         |
| ACHG_MOUSE     | ENSG00000196811          | 1                                | 89036593           | 89036963         |
| ACHD_MOUSE     | ENSG00000135902          | 1                                | 89021553           | 89021854         |
| ACHE_MOUSE     | ENSG00000108556          | 11                               | 70435308           | 70435605         |
| KCRM_MOUSE_1   | ENSG00000104879          | 7                                | 18568267           | 18568567         |
| KCRM_MOUSE_2   | ENSG00000104879          | 7                                | 18568838           | 18569622         |
| MYF6_MOUSE     | ENSG00000111046          | 10                               | 106898903          | 106899202        |
| MYOD_MOUSE     | ENSG00000129152          | 7                                | 46239064           | 46239781         |
| MYL4_MOUSE     | ENSG00000198336          | 11                               | 104392837          | 104393509        |
| TNCC_MOUSE     | ENSG00000114854          | 14                               | 30038200           | 30038502         |
| MYH6_MOUSE     | ENSG00000197616          | 14                               | 53920850           | 53921149         |

**Table S6.** Mouse skeletal reference collection with 25 random genes.

| Ensembl Gene ID | HGNC Symbol | Ensembl Description                                                                                                                                                                                                                      |
|-----------------|-------------|------------------------------------------------------------------------------------------------------------------------------------------------------------------------------------------------------------------------------------------|
| ENSG00000143632 | ACTA1       | Actin, alpha skeletal muscle (Alpha-actin-1) [Source:UniProtKB/Swiss-Prot;Acc:P68133]                                                                                                                                                    |
| ENSG00000159251 | ACTC1       | Actin, alpha, cardiac muscle 1 [Source:HGNC Symbol;Acc:143]                                                                                                                                                                              |
| ENSG00000149925 | ALDOA       | Fructose-bisphosphate aldolase A (EC 4.1.2.13)(Muscle-type aldolase)(Lung cancer antigen NY-LU-1) [Source:UniProtKB/Swiss-Prot;Acc:P04075]                                                                                               |
| ENSG00000050820 | BCAR1       | Breast cancer anti-estrogen resistance protein 1 (CRK-associated substrate)(p130cas)(Cas scaffolding protein family member 1) [Source:UniProtKB/Swiss-Prot;Acc:P56945]                                                                   |
| ENSG00000108688 | CCL7        | C-C motif chemokine 7 Precursor (Small-inducible cytokine A7)(Monocyte chemoattractant protein 3)(Monocyte chemotactic protein 3)(MCP-3)(NC28) [Source:UniProtKB/Swiss-Prot;Acc:P80098]                                                  |
| ENSG00000138435 | CHRNA1      | Acetylcholine receptor subunit alpha Precursor [Source:UniProtKB/Swiss-Prot;Acc:P02708]                                                                                                                                                  |
| ENSG00000170175 | CHRNB1      | Acetylcholine receptor subunit beta Precursor [Source:UniProtKB/Swiss-Prot;Acc:P11230]                                                                                                                                                   |
| ENSG00000135902 | CHRND       | Acetylcholine receptor subunit delta Precursor [Source:UniProtKB/Swiss-Prot;Acc:Q07001]                                                                                                                                                  |
| ENSG00000108556 | CHRNE       | Acetylcholine receptor subunit epsilon Precursor [Source:UniProtKB/Swiss-Prot;Acc:Q04844]                                                                                                                                                |
| ENSG00000196811 | CHRNG       | Acetylcholine receptor subunit gamma Precursor [Source:UniProtKB/Swiss-Prot;Acc:P07510]                                                                                                                                                  |
| ENSG00000104879 | CKM         | Creatine kinase M-type (EC 2.7.3.2)(Creatine kinase M chain)(M-CK) [Source:UniProtKB/Swiss-Prot;Acc:P06732]                                                                                                                              |
| ENSG00000166394 | CYB5R2      | NADH-cytochrome b5 reductase 2 (b5R.2)(EC 1.6.2.2) [Source:UniProtKB/Swiss-Prot;Acc:Q6BCY4]                                                                                                                                              |
| ENSG00000175084 | DES         | Desmin [Source:UniProtKB/Swiss-Prot;Acc:P17661]                                                                                                                                                                                          |
| ENSG00000198947 | DMD         | Dystrophin [Source:UniProtKB/Swiss-Prot;Acc:P11532]                                                                                                                                                                                      |
| ENSG00000163435 | ELF3        | ETS-related transcription factor Elf-3 (E74-like factor 3)(Epithelium-specific Ets transcription factor 1)(ESE-1)(Epithelium-restricted Ets protein ESX)(Epithelial-restricted with serine box) [Source:UniProtKB/Swiss-Prot;Acc:P78545] |
| ENSG00000187672 | ERC2        | ERC protein 2 [Source:UniProtKB/Swiss-Prot;Acc:O15083]                                                                                                                                                                                   |
| ENSG00000138829 | FBN2        | Fibrillin-2 Precursor [Source:UniProtKB/Swiss-Prot;Acc:P35556]                                                                                                                                                                           |
| ENSG00000204007 | GLT6D1      | Glycosyltransferase 6 domain-containing protein 1 (EC 2.4.1.-)(Galactosyltransferase family 6 domain-containing 1) [Source:UniProtKB/Swiss-Prot;Acc:Q7Z4J2]                                                                              |
| ENSG00000100577 | GSTZ1       | Maleylacetoacetate isomerase (MAAI)(EC 5.2.1.2)(Glutathione S-transferase zeta 1)(EC 2.5.1.18)(GSTZ1-1) [Source:UniProtKB/Swiss-Prot;Acc:O43708]                                                                                         |
| ENSG00000129636 | ITFG1       | T-cell immunomodulatory protein Precursor (Protein TIP)(Integrin-alpha FG-GAP repeat-containing protein 1) [Source:UniProtKB/Swiss-Prot;Acc:Q8TB96]                                                                                      |
| ENSG00000111615 | KRR1        | KRR1 small subunit processome component homolog (HIV-1 Rev-binding protein 2)(Rev-interacting protein 1)(Rip-1) [Source:UniProtKB/Swiss-Prot;Acc:Q13601]                                                                                 |
| ENSG00000181541 | MAB21L2     | Protein mab-21-like 2 [Source:UniProtKB/Swiss-Prot;Acc:Q9Y586]                                                                                                                                                                           |
| ENSG00000198125 | MB          | Myoglobin [Source:UniProtKB/Swiss-Prot;Acc:P02144]                                                                                                                                                                                       |
| ENSG00000081189 | MEF2C       | Myocyte-specific enhancer factor 2C [Source:UniProtKB/Swiss-Prot;Acc:Q06413]                                                                                                                                                             |
| ENSG00000139505 | MTMR6       | Myotubularin-related protein 6 (EC 3.1.3.-) [Source:UniProtKB/Swiss-Prot;Acc:Q9Y217]                                                                                                                                                     |

**Table S6.** Mouse skeletal reference collection with 25 random genes (continued).

| Ensembl Gene ID | HGNC Symbol | Ensembl Description                                                                                                                                                                                                                                |
|-----------------|-------------|----------------------------------------------------------------------------------------------------------------------------------------------------------------------------------------------------------------------------------------------------|
| ENSG00000111046 | MYF6        | Myogenic factor 6 (Myf-6) [Source:UniProtKB/Swiss-Prot;Acc:P23409]                                                                                                                                                                                 |
| ENSG00000109063 | MYH3        | Myosin-3 (Myosin heavy chain 3)(Myosin heavy chain, fast skeletal muscle, embryonic)(Muscle embryonic myosin heavy chain)(SMHCE) [Source:UniProtKB/Swiss-Prot;Acc:P11055]                                                                          |
| ENSG00000141048 | MYH4        | Myosin-4 (Myosin heavy chain 4)(Myosin heavy chain 2b)(MyHC-2b)(Myosin heavy chain IIb)(MyHC-IIb)(Myosin heavy chain, skeletal muscle, fetal) [Source:UniProtKB/Swiss-Prot;Acc:Q9Y623]                                                             |
| ENSG00000197616 | MYH6        | Myosin-6 (Myosin heavy chain 6)(Myosin heavy chain, cardiac muscle alpha isoform)(MyHC-alpha) [Source:UniProtKB/Swiss-Prot;Acc:P13533]                                                                                                             |
| ENSG00000092054 | MYH7        | Myosin-7 (Myosin heavy chain 7)(Myosin heavy chain, cardiac muscle beta isoform)(MyHC-beta)(Myosin heavy chain slow isoform)(MyHC-slow) [Source:UniProtKB/Swiss-Prot;Acc:P12883]                                                                   |
| ENSG00000168530 | MYL1        | Myosin light chain 1, skeletal muscle isoform (MLC1F)(A1 catalytic)(Alkali myosin light chain 1) [Source:UniProtKB/Swiss-Prot;Acc:P05976]                                                                                                          |
| ENSG00000198336 | MYL4        | Myosin light chain 4 (Myosin light chain 1, embryonic muscle/atrial isoform)(Myosin light chain alkali, GT-1 isoform) [Source:UniProtKB/Swiss-Prot;Acc:P12829]                                                                                     |
| ENSG00000129152 | MYOD1       | Myoblast determination protein 1 (Myogenic factor 3)(Myf-3) [Source:UniProtKB/Swiss-Prot;Acc:P15172]                                                                                                                                               |
| ENSG00000122180 | MYOG        | Myogenin (Myogenic factor 4)(Myf-4) [Source:UniProtKB/Swiss-Prot;Acc:P15173]                                                                                                                                                                       |
| ENSG00000188162 | OTOG        | Otogelin Precursor [Source:UniProtKB/Swiss-Prot;Acc:Q6ZRI0]                                                                                                                                                                                        |
| ENSG00000169241 | RAG1AP1     | RAG1-activating protein 1 (Stromal cell protein) [Source:UniProtKB/Swiss-Prot;Acc:Q9BRV3]                                                                                                                                                          |
| ENSG00000054967 | RELT        | Tumor necrosis factor receptor superfamily member 19L Precursor (Receptor expressed in lymphoid tissues) [Source:UniProtKB/Swiss-Prot;Acc:Q969Z4]                                                                                                  |
| ENSG00000128482 | RNF112      | RING finger protein 112 (Zinc finger protein 179)(Brain finger protein) [Source:UniProtKB/Swiss-Prot;Acc:Q9ULX5]                                                                                                                                   |
| ENSG00000007314 | SCN4A       | Sodium channel protein type 4 subunit alpha (Sodium channel protein type IV subunit alpha)(Voltage-gated sodium channel subunit alpha Nav1.4)(Sodium channel protein skeletal muscle subunit alpha)(SkM1) [Source:UniProtKB/Swiss-Prot;Acc:P35499] |
| ENSG00000071537 | SEL1L       | Protein sel-1 homolog 1 Precursor (Suppressor of lin-12-like protein 1)(Sel-1L) [Source:UniProtKB/Swiss-Prot;Acc:Q9UBV2]                                                                                                                           |
| ENSG00000099381 | SETD1A      | Histone-lysine N-methyltransferase SETD1A (EC 2.1.1.43)(SET domain-containing protein 1A)(hSET1A)(Set1/Ash2 histone methyltransferase complex subunit SET1)(Lysine N-methyltransferase 2F) [Source:UniProtKB/Swiss-Prot;Acc:O15047]                |
| ENSG00000181856 | SLC2A4      | Solute carrier family 2, facilitated glucose transporter member 4 (Glucose transporter type 4, insulin-responsive)(GLUT-4) [Source:UniProtKB/Swiss-Prot;Acc:P14672]                                                                                |
| ENSG00000184402 | SS18L1      | SS18-like protein 1 (SYT homolog 1) [Source:UniProtKB/Swiss-Prot;Acc:O75177]                                                                                                                                                                       |
| ENSG00000099365 | STX1B       | Syntaxin-1B (Syntaxin-1B1)(Syntaxin-1B2) [Source:UniProtKB/Swiss-Prot;Acc:P61266]                                                                                                                                                                  |
| ENSG00000114854 | TNNC1       | Troponin C, slow skeletal and cardiac muscles (TN-C) [Source:UniProtKB/Swiss-Prot;Acc:P63316]                                                                                                                                                      |
| ENSG00000159173 | TNNI1       | Troponin I, slow skeletal muscle (Troponin I, slow-twitch isoform) [Source:UniProtKB/Swiss-Prot;Acc:P19237]                                                                                                                                        |
| ENSG00000198258 | UBL5        | Ubiquitin-like protein 5 [Source:UniProtKB/Swiss-Prot;Acc:Q9BZL1]                                                                                                                                                                                  |

**Table S6.** Mouse skeletal reference collection with 25 random genes (continued).

| Ensembl Gene ID | HGNC Symbol | Ensembl Description                                                                                                                                                                                                                                                                                       |
|-----------------|-------------|-----------------------------------------------------------------------------------------------------------------------------------------------------------------------------------------------------------------------------------------------------------------------------------------------------------|
| ENSG00000124486 | USP9X       | Probable ubiquitin carboxyl-terminal hydrolase FAF-X (EC 3.1.2.15)(Ubiquitin thioesterase FAF-X)(Ubiquitin-specific-processing protease FAF-X)(Deubiquitinating enzyme FAF-X)(Fat facets protein-related, X-linked)(Ubiquitin-specific protease 9, X chromosome) [Source:UniProtKB/Swiss-Prot;Acc:Q93008] |
| ENSG00000157796 | WDR19       | WD repeat-containing protein 19 [Source:UniProtKB/Swiss-Prot;Acc:Q8NEZ3]                                                                                                                                                                                                                                  |
| ENSG00000166435 | XRRA1       | X-ray radiation resistance-associated protein 1 [Source:UniProtKB/Swiss-Prot;Acc:Q6P2D8]                                                                                                                                                                                                                  |
| ENSG00000161914 | ZNF653      | Zinc finger protein 653 (67 kDa zinc finger protein)(Zinc finger protein Zip67) [Source:UniProtKB/Swiss-Prot;Acc:Q96CK0]                                                                                                                                                                                  |



**Table S7.** Parameters used in the validation of the promoter CRM analyses method.

| Jaspar TFBS Phylum | Max. TFBS Binding Site Distance (bp) | TFBS Score Threshold (%) | Upstream Sequence From TSS (bp) | Downstream Sequence from TSS (bp) |
|--------------------|--------------------------------------|--------------------------|---------------------------------|-----------------------------------|
| Vertebrate         | 225                                  | 80                       | 100                             | 5000                              |
| Vertebrate         | 225                                  | 80                       | 1000                            | 5000                              |
| Vertebrate         | 225                                  | 80                       | 2000                            | 2000                              |
| Vertebrate         | 225                                  | 80                       | 2000                            | 3000                              |
| Vertebrate         | 225                                  | 80                       | 4000                            | 3000                              |
| Vertebrate         | 225                                  | 80                       | 5000                            | 3000                              |
| Vertebrate         | 225                                  | 80                       | 6000                            | 3000                              |
| Vertebrate         | 225                                  | 80                       | 7000                            | 3000                              |
| Vertebrate         | 225                                  | 80                       | 10000                           | 3000                              |

**Table S8.** Mouse myelin gene-associated enhancer genomic coordinates.

| Gene Enhancers   | Human<br>Ensembl Gene Id | Mouse Assembly 36 Feb 2006 (mm8) |                    |                  |
|------------------|--------------------------|----------------------------------|--------------------|------------------|
|                  |                          | Chr                              | From<br>Coordinate | To<br>Coordinate |
| <i>Cldn11</i>    | ENSG00000013297          | 3                                | 31357206           | 31357836         |
| <i>Cnp</i>       | ENSG00000173786          | 11                               | 100391366          | 100392107        |
| <i>Ermin</i>     | ENSG00000136541          | 2                                | 57868209           | 57868795         |
| <i>Gjb1/Cx32</i> | ENSG00000169562          | X                                | 97586055           | 97586691         |
| <i>Mal</i>       | ENSG00000172005          | 2                                | 127318715          | 127319393        |
| <i>Mbp_M3</i>    | ENSG00000197971          | 18                               | 82683969           | 82684438         |
| <i>Mbp_M4</i>    | ENSG00000197971          | 18                               | 82680074           | 82680286         |
| <i>Olig1</i>     | ENSG00000184221          | 16                               | 91189705           | 91190805         |
| <i>Olig2</i>     | ENSG00000205927          | 16                               | 91097897           | 91098790         |
| <i>Plp_Pk211</i> | ENSG00000123560          | X                                | 132185516          | 132186725        |
| <i>Plp_WmN1</i>  | ENSG00000123560          | X                                | 132172873          | 132174044        |
| <i>Plp_WmN2</i>  | ENSG00000123560          | X                                | 132174737          | 132175770        |
| <i>Pou3fl</i>    | ENSG00000185668          | 4                                | 124169971          | 124170620        |

**Table S9.** Positive and negative groupings for oligodendrocyte enhancers.

| Enhancer        | Enhancer Group |
|-----------------|----------------|
| <i>Cldn11</i>   | Positive       |
| <i>Mal</i>      | Positive       |
| <i>Mbp_M3</i>   | Positive       |
| <i>Plp_WmN1</i> | Positive       |
| <i>Cnp</i>      | Negative       |
| <i>Ernn</i>     | Negative       |

**Table S10.** Gene Ontology molecular function term enrichment analysis of optic nerve expression data.

GO molecular function enrichment analysis for genes differentially expressed in murine optic nerves between postnatal day 4 and postnatal day 10 (using p-value cut-off of 0.01 and database filters: MGI – Mouse Genome Informatics and RGD – Rat Genome Database). In some cases, the same mouse and rat gene symbols are indicated.

| GO Term            | P-value  | Sample frequency (MGI + RGD) | Background frequency (MGI + RGD) | Genes                                                                                                                                                                                                                                                                                                                                                                                                                                                                                                                                                                                                                                                                                                                                                                                                                                                                                                                                                                                                                                                                                                                                                                                                                                                                                                                                                                                                                                                                                                                                                                                                                                                                                                                                                                                                                                                                                             |
|--------------------|----------|------------------------------|----------------------------------|---------------------------------------------------------------------------------------------------------------------------------------------------------------------------------------------------------------------------------------------------------------------------------------------------------------------------------------------------------------------------------------------------------------------------------------------------------------------------------------------------------------------------------------------------------------------------------------------------------------------------------------------------------------------------------------------------------------------------------------------------------------------------------------------------------------------------------------------------------------------------------------------------------------------------------------------------------------------------------------------------------------------------------------------------------------------------------------------------------------------------------------------------------------------------------------------------------------------------------------------------------------------------------------------------------------------------------------------------------------------------------------------------------------------------------------------------------------------------------------------------------------------------------------------------------------------------------------------------------------------------------------------------------------------------------------------------------------------------------------------------------------------------------------------------------------------------------------------------------------------------------------------------|
| GO:0005488 binding | 2.47E-07 | 309/504 (61.3%)              | 10628/22524 (47.2%)              | <i>Cdca5 Fkbp10 Emilin1 Kcnj10 S100a1 Ngfr Tpd52 Tgfr2 S100a1 Elk3 Dock9 Tcf7 Ptp4a3 Idh1 Ndn Nek6 Ywhaq Fos Chfr Bmp6 Eif4ebp2 Cxcl12 Col5a1 Ier3 Ssbp3 Myoc Arap3 Gjb2 Sept8 Jam3 Illrap Crym Dab2ip Ctse Ywhah Cdt1 Tgm2 Sp5 Gnas Erbb3 Pdlim2 Aplp1 Cacnb4 Ascl1 Klf2 Wdr6 Tcf3 Gas6 Fzd2 Klhl2 Cdc371l Rras2 Taldo1 Nid2 Txnip Arpc1a Ywhah Axin1 Tgfbi Kcnj10 Elk3 Arpc1b Col5a1 Sema4d Cebpb Bmp7 Gstm1 Eng Ddx39 Eglf7 S100a4 Sdc1 Eya2 Rrm2 Plp1 Birc2 Rims2 Eps15 Myoc Spred2 Rrm2 Ncapd2 Ckap4 Dab2ip Wnt7b Adamts4 Tcf7 Eps15 Sirt2 Dgkz Mcm6 Emilin1 Mfge8 Cdc371l Vldlr Kctd12 Rims2 Ets2 Adipor1 Igfbp2 Plekhh1 Ywhaq Sema4d Mast2 Mknk2 Bgn Ntsr2 Strn Loxl1 Aplp1 Cdca5 Tpd52 Mknk2 Lyve1 Cebpb Gsn F2r Ccnb2 Fgf13 S100a4 Med16 Fli1 Csd2 Fos Sytl2 Fgfr1 Acta1 Prkc Nkx6-2 Wnt7b Fmnl3 Ramp2 Cldn11 Fzd2 Wasf2 Igfbp5 Nfic Plekhh1 Biccl1 Id4 Trp53 Igb5 Nid2 Ehd4 Sept2 Smad1 Sox7 Actn1 Aatk Acat2 Ets2 Dlk1 Ctse Emid2 Cacnb4 Tprkb Klf2 Wasf2 Tgfr2 Tcfe2a Scap Car2 Otud7b Ets1 Prkc Lasp1 Acss2 Erbb3 Illrap Cldn5 Vldlr Tgm2 Gusb Ssbp3 Mcm7 Antxr1 Med9 Rab34 Ascl1 Rasip1 Fgf13 Gli1 Rcn3 Ppic Txnip Dgkz Fcgr2b Scap Cxcr4 Bgn Cyp1b1 Ngfr Tead2 Dlk1 Sept2 Pdgfrb Rap1a Mmp14 Reep5 Gli1 Fkbp10 Mast2 Ski Lsm2 Smarcd3 Uhrf1 Rap1a Cpox Smarcd3 Igfbp2 Piga Dhcr24 Rab34 Mtap7 Ndn Nfic Igfbp5 Tead2 Eng Grb14 Gtf2ird1 Chfr Akt1 Efh2 Loxl1 Ntsr2 Fcgr2b Akt1 Ets1 Tcf3 Pdk4 Mcm2 Plekha1 Glrb Rras2 Crym Reep5 Creb3l1 Ptx3 Ctsb Fermt3 Itgb5 Surf4 Klf4 Dact1 Birc2 Plp1 Slc2a1 Mfge8 Cdt1 Slc2a1 Wif1 Gnas Lrrc59 Adipor1 Fdft1 Spred2 Id4 Gjb2 Klf4 Arf3 Lasp1 Eif4ebp2 Ddc Gtf2ird1 Racgap1 Smad1 Ptx3 Lyve1 Bmp6 Mcm2 Lrp10 Efh2 Sh3gl3 Pdgfrb Ehd4 Fzr1 Lrp10 Fnta Foxf2 Mest Dock9 Nkx6-2 Mcm6 Sept9 Gamt Cldn11 Mdk Igfbp4 Timm17a Grb14 Mcm7 Pctk3 Sox7 Pxn Cxcl12 Igfbp4 Glrb Stard4 Tprkb B4galt1 B4galt1 Sh3gl3 Pxn S100a3 Dact1 Axin1 Actn1 Bmp7</i> |

**Table S10.** Gene Ontology molecular function term enrichment analysis of optic nerve expression data (continued).

| GO Term                                                 | P-value  | Sample frequency (MGI + RGD) | Background frequency (MGI + RGD) | Genes                                                                                                                                                                                                                                                                                                                                                                                                                                                                                                                                                                                                                                                                                                                                                                                                                                                                                                                                                                                                                                                                                                                                                                                                                                                                                                                                                                                                                                                                                                                                                                                                                                    |
|---------------------------------------------------------|----------|------------------------------|----------------------------------|------------------------------------------------------------------------------------------------------------------------------------------------------------------------------------------------------------------------------------------------------------------------------------------------------------------------------------------------------------------------------------------------------------------------------------------------------------------------------------------------------------------------------------------------------------------------------------------------------------------------------------------------------------------------------------------------------------------------------------------------------------------------------------------------------------------------------------------------------------------------------------------------------------------------------------------------------------------------------------------------------------------------------------------------------------------------------------------------------------------------------------------------------------------------------------------------------------------------------------------------------------------------------------------------------------------------------------------------------------------------------------------------------------------------------------------------------------------------------------------------------------------------------------------------------------------------------------------------------------------------------------------|
| GO:0019911<br>structural constituent of myelin sheath   | 3.56E-07 | 6/504 (1.2%)                 | 6/22524 (0.0%)                   | <i>Mobp Mbp Mobp Plp1 Mal Tspan2</i>                                                                                                                                                                                                                                                                                                                                                                                                                                                                                                                                                                                                                                                                                                                                                                                                                                                                                                                                                                                                                                                                                                                                                                                                                                                                                                                                                                                                                                                                                                                                                                                                     |
| GO:0019838<br>growth factor binding                     | 2.14E-05 | 15/504 (3.0%)                | 101/22524 (0.4%)                 | <i>Ngfr Tgfr2 Il1rap Erbb3 Col5a1 Eng Igfbp2 Igfbp5 Il1rap Ngfr Igfbp2 Igfbp5 Pdgfrb Igfbp4 Igfbp4</i>                                                                                                                                                                                                                                                                                                                                                                                                                                                                                                                                                                                                                                                                                                                                                                                                                                                                                                                                                                                                                                                                                                                                                                                                                                                                                                                                                                                                                                                                                                                                   |
| GO:0005515<br>protein binding                           | 1.67E-04 | 264/504 (52.4%)              | 9167/22524 (40.7%)               | <i>Cdca5 Fkbp10 Emilin1 Kcnj10 S100a1 Ngfr Tpd52 Tgfr2 S100a1 Dock9 Tcf7 Ptp4a3 Ndn Nek6 Ywhaq Chfr Bmp6 Eif4ebp2 Cxcl12 Col5a1 Ier3 Myoc Arap3 Gjb2 Sept8 Jam3 Il1rap Dab2ip Ctse Ywhah Cdt1 Tgm2 Gnas Erbb3 Pdlim2 Aplp1 Cacnb4 Klf2 Wdr6 Tcf3 Gas6 Fzd2 Klf12 Cdc371l Rras2 Taldol1 Nid2 Txnip Arpc1a Ywhah Axin1 Kcnj10 Elk3 Arpc1b Col5a1 Sema4d Cebpb Bmp7 Gstm1 Eng Ddx39 S100a4 Sdc1 Rrm2 Plp1 Birc2 Rims2 Eps15 Myoc Spred2 Rrm2 Ncapd2 Ckap4 Dab2ip Wnt7b Adamts4 Eps15 Sirt2 Dgkz Mcm6 Emilin1 Mfge8 Cdc371l Vldlr Kctd12 Rims2 Ets2 Adipor1 Igfbp2 Plekhh1 Ywhaq Sema4d Mast2 Mknk2 Strn Loxl1 Aplp1 Cdca5 Tpd52 Mknk2 Cebpb Gsn F2r Ccnb2 Fgf13 S100a4 Med16 Fli1 Csd2 Fos Sytl2 Fgfr1 Acta1 Prkcz Wnt7b Fmn13 Ramp2 Cldn11 Fzd2 Wasf2 Igfbp5 Plekhh1 Id4 Trp53 Itgb5 Nid2 Ehd4 Sept2 Smad1 Actn1 Aatk Acat2 Dlk1 Ctse Emid2 Cacnb4 Tprkb Klf2 Wasf2 Tgfr2 Tcf2a Scap Car2 Otud7b Ets1 Prkcz Lasp1 Acss2 Erbb3 Il1rap Cldn5 Vldlr Mcm7 Antxr1 Med9 Ascl1 Rasip1 Fgf13 Gli1 Rcn3 Txnip Dgkz Fcgr2b Scap Cxcr4 Cyp1b1 Ngfr Dlk1 Sept2 Pdgfrb Rap1a Mmp14 Reep5 Gli1 Fkbp10 Mast2 Ski Lsm2 Smarcd3 Uhrf1 Rap1a Cpox Smarcd3 Igfbp2 Piga Dhcr24 Mtap7 Ndn Nfic Igfbp5 Eng Grb14 Chfr Akt1 Ehd2 Loxl1 Fcgr2b Akt1 Ets1 Tcf3 Mcm2 Glrb Rras2 Crym Reep5 Ctsb Fermt3 Itgb5 Surf4 Dact1 Birc2 Plp1 Slc2a1 Mfge8 Cdt1 Slc2a1 Wif1 Gnas Lrrc59 Adipor1 Fdft1 Spred2 Id4 Gjb2 Lasp1 Eif4ebp2 Ddc Gtf2ird1 Racgap1 Smad1 Bmp6 Mcm2 Lrp10 Ehd2 Sh3gl3 Pdgfrb Ehd4 Fzr1 Lrp10 Fnta Mest Dock9 Mcm6 Sept9 Gamt Cldn11 Igfbp4 Timm17a Grb14 Pctk3 Pxn Cxcl12 Igfbp4 Glrb Tprkb B4galt1 B4galt1 Sh3gl3 Pxn S100a3 Dact1 Axin1 Actn1 Bmp7</i> |
| GO:0004450<br>isocitrate dehydrogenase (NADP+) activity | 7.25E-04 | 4/504 (0.8%)                 | 4/22524 (0.0%)                   | <i>Idh1 Idh2 Idh2 Idh1</i>                                                                                                                                                                                                                                                                                                                                                                                                                                                                                                                                                                                                                                                                                                                                                                                                                                                                                                                                                                                                                                                                                                                                                                                                                                                                                                                                                                                                                                                                                                                                                                                                               |

**Table S10.** Gene Ontology molecular function term enrichment analysis of optic nerve expression data (continued).

| GO Term                                          | P-value  | Sample frequency (MGI + RGD) | Background frequency (MGI + RGD) | Genes                                                                                                                                                                                              |
|--------------------------------------------------|----------|------------------------------|----------------------------------|----------------------------------------------------------------------------------------------------------------------------------------------------------------------------------------------------|
| GO:0005520<br>insulin-like growth factor binding | 5.26E-03 | 6/504<br>(1.2%)              | 18/22524<br>(0.1%)               | <i>Igfbp2 Igfbp5 Igfbp2 Igfbp5 Igfbp4 Igfbp4</i>                                                                                                                                                   |
| GO:0003700<br>transcription factor activity      | 7.61E-03 | 33/504<br>(6.5%)             | 604/22524<br>(2.7%)              | <i>Elk3 Tcf7 Fos Ascl1 Tcf3 Elk3 Cebpb Tcf7 Cebpb Fos Nkx6-2 Nfic Trp53 Smad1 Sox7 Klf2 Tefe2a Ets1 Ascl1 Gli1 Gli1 Nfic Gtf2ird1 Ets1 Tcf3 Creb3l1 Klf4 Klf4 Gtf2ird1 Smad1 Foxf2 Nkx6-2 Sox7</i> |

**Table S11.** Gene Ontology cellular component term enrichment analysis of optic nerve expression data.

GO cellular component enrichment analysis for genes differentially expressed in murine optic nerves between postnatal day 4 and postnatal day 10 (using p-value cut-off of 0.01 and database filters: MGI – Mouse Genome Informatics and RGD – Rat Genome Database). In some cases, the same mouse and rat gene symbols are indicated.

| GO Term                                 | P-value  | Sample frequency (MGI + RGD) | Background frequency (MGI + RGD) | Genes                                                                                                                                                                                                                                                                                            |
|-----------------------------------------|----------|------------------------------|----------------------------------|--------------------------------------------------------------------------------------------------------------------------------------------------------------------------------------------------------------------------------------------------------------------------------------------------|
| GO:0043209<br>myelin sheath             | 4.22E-05 | 8/504<br>(1.6%)              | 22/22524<br>(0.1%)               | <i>Mbp Plp1 Mag Mbp Plp1 Plp Tubb4 Mag</i>                                                                                                                                                                                                                                                       |
| GO:0044421<br>extracellular region part | 3.00E-04 | 45/504<br>(8.9%)             | 853/22524<br>(3.8%)              | <i>Emilin1 Efemp2 Bmp6 Cxcl12 Col5a1 Myoc Erbb3 Nid2 Tgfbi Col5a1 Bmp7 Egfl7 Grn Myoc Wnt7b Adamts4 Emilin1 Mfge8 Vldlr Igfbp2 Bgn Loxl1 Gsn Tgfbi Cnp Nid2 Ltbp3 Emid2 Car2 Vldlr Tgm2 Dkk3 Bgn Col18a1 Igfbp2 Igfbp5 Loxl1 Mfge8 Grn Col18a1 Egfl7 Mdk Igfbp4 Igfbp4 Bmp7</i>                  |
| GO:0005576<br>extracellular region      | 8.18E-03 | 48/504<br>(9.5%)             | 1056/22524<br>(4.7%)             | <i>Emilin1 Efemp2 Bmp6 Cxcl12 Col5a1 Myoc Erbb3 Nid2 Tgfbi Col5a1 Bmp7 Gstm1 Egfl7 Grn Myoc Wnt7b Adamts4 Emilin1 Mfge8 Vldlr Igfbp2 Bgn Loxl1 Gsn Tgfbi Cnp Nid2 Ltbp3 Ltbp3 Emid2 Car2 Vldlr Tgm2 Dkk3 Bgn Col18a1 Igfbp2 Igfbp5 Loxl1 Ctsb Mfge8 Grn Col18a1 Egfl7 Mdk Igfbp4 Igfbp4 Bmp7</i> |

**Table S12.** Validation of promoter CRM analyses method using the skeletal muscle reference collection and a full ortholog background.

Top ranked CRM predictions from the promoter analyses validation using the full muscle reference collection (25 genes), a full ortholog background dataset, and the following analysis parameters: search regions: 2000 base pairs (bp) upstream and downstream of the transcription start site; inter-binding site distance constraint of 225 bp; and all vertebrate TF binding profiles with instances that satisfy an 80% threshold. Known skeletal muscle CRMs are highlighted in yellow.

Analyses of skeletal muscle-specific genes recovered known cis-regulatory modules composed of MEF2A, SP1, SRF, and TEAD1 TFBS in the top twelve predicted pairs (Table S7). Another top-ranked TFBS pair prediction was MEF2A/HAND1-TCFE2A(TCF3). HAND1 is a basic helix-loop-helix (bHLH) transcription factor family that, amongst other roles, is required for vascular smooth muscle recruitment (1) and regulation of cardiomyocyte development (2). HAND1 also inhibits MYOD-dependent skeletal muscle cell differentiation and muscle-specific myosin heavy chain protein expression (3). Interestingly, a recent study demonstrated that MEF2A/HAND1 interactions result in synergistic activation of MEF2A-dependent promoters in cardiac muscle (cardiomyocytes) (4)]. As such, this skeletal muscle CRM predictions may warrant further investigation.

Abbreviations used: FG=Foreground; BG=Background



**Table S12 A.** TF class pair over-representation (top six results).

| TF Name      | Class | TF Name      | Class           | FG Hits | FG Non Hits | BG Hits | BG Non Hits | Score      |
|--------------|-------|--------------|-----------------|---------|-------------|---------|-------------|------------|
| <b>MEF2A</b> | MADS  | <b>SP1</b>   | ZN-FINGER, C2H2 | 13      | 12          | 1214    | 13907       | 1.2562e-08 |
| MEF2A        | MADS  | Hand1-Tcfe2a | bHLH            | 14      | 11          | 1800    | 13321       | 1.4654e-07 |
| MEF2A        | MADS  | ZEB1         | ZN-FINGER, C2H2 | 18      | 7           | 3631    | 11490       | 5.7498e-07 |
| MEF2A        | MADS  | Roaz         | ZN-FINGER, C2H2 | 6       | 19          | 306     | 14815       | 9.2682e-06 |
| <b>MEF2A</b> | MADS  | <b>SRF</b>   | MADS            | 4       | 21          | 83      | 15038       | 1.1715e-05 |
| <b>MEF2A</b> | MADS  | <b>TEAD1</b> | TEA             | 6       | 19          | 347     | 14774       | 1.8698e-05 |

**Table S12 B.** Top twelve detected over-represented TFBS pairs.

| TF Name      | Class            | TF Name      | Class            | FG Hits | FG Non Hits | BG Hits | BG Non Hits | Score      |
|--------------|------------------|--------------|------------------|---------|-------------|---------|-------------|------------|
| <b>MEF2A</b> | MADS             | <b>SP1</b>   | ZN-FINGER, C2H2  | 13      | 37          | 1214    | 13907       | 0.00012414 |
| MEF2A        | MADS             | TAL1-TCF3    | bHLH             | 9       | 41          | 602     | 14519       | 0.00014999 |
| <b>MEF2A</b> | MADS             | <b>SRF</b>   | MADS             | 4       | 46          | 83      | 15038       | 0.00018999 |
| MEF2A        | MADS             | Hand1-Tcfe2a | bHLH             | 15      | 35          | 1800    | 13321       | 0.00052526 |
| MEF2A        | MADS             | Roaz         | ZN-FINGER, C2H2  | 6       | 44          | 306     | 14815       | 0.00053505 |
| <b>MEF2A</b> | MADS             | <b>TEAD1</b> | TEA              | 6       | 44          | 347     | 14774       | 0.0010191  |
| MEF2A        | MADS             | YY1          | ZN-FINGER, C2H2  | 17      | 33          | 2294    | 12827       | 0.0010286  |
| RORA_1       | NUCLEAR RECEPTOR | Hand1-Tcfe2a | bHLH             | 19      | 31          | 2751    | 12370       | 0.0013039  |
| Nkx2-5       | HOMEO            | ESR1         | NUCLEAR RECEPTOR | 4       | 46          | 147     | 14974       | 0.001522   |
| YY1          | ZN-FINGER, C2H2  | NKX2-5_V2    | HOMEO            | 35      | 15          | 7109    | 8012        | 0.0015308  |
| <b>SP1</b>   | ZN-FINGER, C2H2  | <b>TEAD1</b> | TEA              | 11      | 39          | 1215    | 13906       | 0.0018149  |
| MEF2A        | MADS             | RORA_1       | NUCLEAR RECEPTOR | 9       | 41          | 876     | 14245       | 0.0021661  |

**Table S13.** Validation of promoter CRM analyses method using the muscle reference collection and random background samples.

Top ranked CRM predictions from the promoter analyses validation using the full muscle reference collection (25 genes), two randomly sampled background datasets of 5000 ortholog pairs, and the following analysis parameters: search regions: 2000 base pairs (bp) upstream and downstream of the transcription start site; inter-binding site distance constraint of 225 bp; and all vertebrate TF binding profiles with instances that satisfy an 80% threshold. Known skeletal muscle CRMs are highlighted in yellow.

The initial ranked TFBS pair results for both analyses methods using a full background (see Table S8) versus a random background (see Table S9 below) are consistent. We computed Z ratios for the proportion of TFBS background hits in a full background sample versus the randomized background sample for each matching TFBS pair prediction and found that these differences were not significant at a p-value threshold cut-off of 0.05 (data not shown). Notably, an additional known skeletal muscle CRM: MYF-SP1 was also identified with the random background approach.

Abbreviations used: FG=Foreground; BG=Background

**Table S13 A.** TF class pair over-representation (top six results).

| TF Name      | Class | TF Name      | Class           | FG Hits | FG Non Hits | BG Hits | BG Non Hits | Score      |
|--------------|-------|--------------|-----------------|---------|-------------|---------|-------------|------------|
| <b>MEF2A</b> | MADS  | <b>SP1</b>   | ZN-FINGER, C2H2 | 13      | 12          | 380     | 4620        | 7.3789e-09 |
| MEF2A        | MADS  | Hand1-Tcfe2a | bHLH            | 14      | 11          | 600     | 4400        | 1.7605e-07 |
| MEF2A        | MADS  | ZEB1         | ZN-FINGER, C2H2 | 18      | 7           | 1212    | 3788        | 7.0572e-07 |
| <b>MEF2A</b> | MADS  | <b>SRF</b>   | MADS            | 4       | 21          | 22      | 4978        | 6.6204e-06 |
| MEF2A        | MADS  | Roaz         | ZN-FINGER, C2H2 | 6       | 19          | 95      | 4905        | 7.3819e-06 |
| <b>MEF2A</b> | MADS  | <b>TEAD1</b> | TEA             | 6       | 19          | 115     | 4885        | 2.0963e-05 |

**Table S13 B.** Top twelve over-represented TFBS pairs.

| TF Name      | Class           | TF Name      | Class           | FG Hits | FG Non Hits | BG Hits | BG Non Hits | Score      |
|--------------|-----------------|--------------|-----------------|---------|-------------|---------|-------------|------------|
| <b>MEF2A</b> | MADS            | <b>SP1</b>   | ZN-FINGER, C2H2 | 13      | 12          | 412     | 4580        | 1.9574e-08 |
| MEF2A        | MADS            | Hand1-Tcf2a  | bHLH            | 14      | 11          | 587     | 4405        | 1.3671e-07 |
| MEF2A        | MADS            | ZEB1         | ZN-FINGER, C2H2 | 18      | 7           | 1180    | 3812        | 4.7407e-07 |
| <b>Myf</b>   | bHLH            | <b>SP1</b>   | ZN-FINGER, C2H2 | 18      | 7           | 1215    | 3777        | 7.5269e-07 |
| SP1          | ZN-FINGER, C2H2 | Myb          | TRP-CLUSTER     | 21      | 4           | 1755    | 3237        | 7.7509e-07 |
| Myf          | bHLH            | ZEB1         | ZN-FINGER, C2H2 | 23      | 2           | 2190    | 2802        | 1.0915e-06 |
| MEF2A        | MADS            | Myb          | TRP-CLUSTER     | 12      | 13          | 518     | 4474        | 2.4437e-06 |
| MEF2A        | MADS            | Pdx1         | HOMEO           | 16      | 9           | 1008    | 3984        | 2.5554e-06 |
| MEF2A        | MADS            | Roaz         | ZN-FINGER, C2H2 | 6       | 19          | 92      | 4900        | 6.2484e-06 |
| <b>MEF2A</b> | MADS            | <b>SRF</b>   | MADS            | 4       | 21          | 29      | 4963        | 1.7811e-05 |
| <b>MEF2A</b> | MADS            | <b>TEAD1</b> | TEA             | 6       | 19          | 112     | 4880        | 1.8315e-05 |
| MEF2A        | MADS            | Nobox        | HOMEO           | 13      | 12          | 764     | 4228        | 2.2662e-05 |

**Table S14.** Validation of promoter CRM analyses method using the muscle reference collection with 25 randomly selected genes and random background samples.

Top ranked CRM predictions from the promoter analyses validation using a dataset of 50 genes (25 muscle collection genes and 25 additional randomly selected genes), two randomly sampled background datasets of 5000 ortholog pairs, and the following analysis parameters: search regions: 2000 base pairs (bp) upstream and downstream of the transcription start site; inter-binding site distance constraint of 225 bp; and all vertebrate TF binding profiles. Known skeletal muscle CRMs are highlighted in yellow.

While the TFBS pair results for the noise-added dataset (see Table S11 below) is comparable with that of the analyses performed on the original reference collection (see Table S9), one CRM: MYF-SO1 was not identified. Interestingly, an additional known skeletal muscle CRM: SP1-TEAD1, was raised to rank 11 from rank 14. It is likely that predicted TFBS combinations associated with the random genes elevated the ranking of this known and over-represented CRM.

**Table S14 A.** TF class pair over-representation (top six results).

| TF Name | Class            | TF Name      | Class           | FG Hits | FG Non Hits | BG Hits | BG Non Hits | Score      |
|---------|------------------|--------------|-----------------|---------|-------------|---------|-------------|------------|
| MEF2A   | MADS             | SP1          | ZN-FINGER, C2H2 | 13      | 37          | 392     | 4608        | 0.00010643 |
| MEF2A   | MADS             | SRF          | MADS            | 4       | 46          | 30      | 4970        | 0.00031695 |
| MEF2A   | MADS             | Hand1-Tcfe2a | bHLH            | 15      | 35          | 576     | 4424        | 0.00039347 |
| MEF2A   | MADS             | Roaz         | ZN-FINGER, C2H2 | 6       | 44          | 97      | 4903        | 0.00047758 |
| RORA_1  | NUCLEAR RECEPTOR | Hand1-Tcfe2a | bHLH            | 19      | 31          | 878     | 4122        | 0.00059197 |
| MEF2A   | MADS             | TEAD1        | TEA             | 6       | 44          | 104     | 4896        | 0.00067878 |

**Table S14 B.** Top twelve over-represented TFBS pairs.

| TF Name (ID) | Class            | TF Name (ID) | Class            | FG Hits | FG Non Hits | BG Hits | BG Non Hits | Score      |
|--------------|------------------|--------------|------------------|---------|-------------|---------|-------------|------------|
| MEF2A        | MADS             | SP1          | ZN-FINGER, C2H2  | 13      | 37          | 390     | 4602        | 0.0001028  |
| MEF2A        | MADS             | SRF          | MADS             | 4       | 46          | 25      | 4967        | 0.00016937 |
| MEF2A        | MADS             | TAL1-TCF3    | bHLH             | 9       | 41          | 207     | 4785        | 0.00022234 |
| MEF2A        | MADS             | Roaz         | ZN-FINGER, C2H2  | 6       | 44          | 90      | 4902        | 0.00032911 |
| MEF2A        | MADS             | YY1          | ZN-FINGER, C2H2  | 17      | 33          | 723     | 4269        | 0.00047675 |
| MEF2A        | MADS             | Hand1-Tcfe2a | bHLH             | 15      | 35          | 593     | 4399        | 0.00054489 |
| MEF2A        | MADS             | TEAD1        | TEA              | 6       | 44          | 110     | 4882        | 0.00090635 |
| YY1          | ZN-FINGER, C2H2  | NKX2-5_V2    | HOMEO            | 35      | 15          | 2323    | 2669        | 0.00096387 |
| RORA_1       | NUCLEAR RECEPTOR | Hand1-Tcfe2a | bHLH             | 19      | 31          | 900     | 4092        | 0.001248   |
| NR2F1        | NUCLEAR RECEPTOR | MEF2A        | MADS             | 5       | 45          | 81      | 4911        | 0.0014885  |
| SP1          | ZN-FINGER, C2H2  | TEAD1        | TEA              | 11      | 39          | 390     | 4602        | 0.0015315  |
| MEF2A        | MADS             | RORA_1       | NUCLEAR RECEPTOR | 9       | 41          | 276     | 4716        | 0.0016714  |

**Table S15.** Vertebrate TF profile clustering and class label assignment.

| Cluster # | Jaspar TFBS | Jaspar TFBS ID | TFBS Class Label      |
|-----------|-------------|----------------|-----------------------|
| 1         | Arnt        | MA0004         | HLH GRP               |
| 1         | MAX         | MA0058         | HLH GRP               |
| 1         | MYC-MAX     | MA0059         | HLH GRP               |
| 1         | Mycn        | MA0104         | HLH GRP               |
| 1         | USF1        | MA0093         | HLH GRP               |
| 2         | Arnt-Ahr    | MA0006         | ARNT-AHR (HLH)        |
| 2         | Pax6        | MA0069         | PAX6 (HOX)            |
| 3         | Ar          | MA0007         | AR (NR)               |
| 3         | NR3C1       | MA0113         | NR3C1 (NR)            |
| 4         | T           | MA0009         | BRACHYURY-T (TDOMAIN) |
| 4         | ZEB1        | MA0103         | ZEB1 (ZF)             |
| 5         | Pax5        | MA0014         | PAX5 (HOX)            |
| 6         | HNF4A       | MA0114         | NR GRP                |
| 6         | NR1H2-RXRA  | MA0115         | NR GRP                |
| 6         | NR2F1       | MA0017         | NR GRP                |
| 6         | PPARG-RXRA  | MA0065         | NR GRP                |
| 7         | CREB1       | MA0018         | CREB1 (LEUZIP)        |
| 7         | RORA_1      | MA0071         | RORA1 (NR)            |
| 7         | RORA_2      | MA0072         | RORA2 (NR)            |
| 8         | Cebpa       | MA0102         | CEBPA (LEUZIP)        |
| 8         | Ddit3-Cebpa | MA0019         | DDIT3-CEBPA (LEUZIP)  |
| 9         | E2F1        | MA0024         | E2F1 (TFF)            |
| 10        | HLF         | MA0043         | HLF (LEUZIP)          |
| 10        | NFIL3       | MA0025         | NFIL3 (LEUZIP)        |
| 11        | ELF5        | MA0136         | ETS GRP               |
| 11        | ELK1        | MA0028         | ETS GRP               |
| 11        | ELK4        | MA0076         | ETS GRP               |
| 11        | GABPA       | MA0062         | ETS GRP               |
| 11        | SPIB        | MA0081         | ETS GRP               |
| 12        | Evi1        | MA0029         | EV1 (ZF)              |
| 13        | Foxa2       | MA0047         | FKH GRP               |
| 13        | FOXD1       | MA0031         | FKH GRP               |
| 13        | Foxd3       | MA0041         | FKH GRP               |
| 13        | FOXF2       | MA0030         | FKH GRP               |
| 13        | FOXJ1       | MA0042         | FKH GRP               |
| 13        | Foxq1       | MA0040         | FKH GRP               |
| 14        | Gfi         | MA0038         | GFI (ZF)              |
| 14        | NFYA        | MA0060         | NFYA (CCAATBOX)       |
| 14        | PBX1        | MA0070         | PBX1 (HOX)            |
| 15        | HNF1A       | MA0046         | HNF1A (HOX)           |

**Table S15.** Vertebrate TF profile clustering and class label assignment (continued).

| Cluster # | Jaspar TFBS  | Jaspar TFBS ID | TFBS Class Label      |
|-----------|--------------|----------------|-----------------------|
| 16        | Myb          | MA0100         | MYB (MYB)             |
| 16        | Myf          | MA0055         | MYF (HLH)             |
| 16        | NHLH1        | MA0048         | NHLH1 (HLH)           |
| 17        | IRF1         | MA0050         | IRF1 (IRF)            |
| 17        | IRF2         | MA0051         | IRF2 (IRF)            |
| 17        | STAT1        | MA0137         | STAT1 (STAT)          |
| 18        | MEF2A        | MA0052         | MEF2A (MADS)          |
| 19        | MZF1_1-4     | MA0056         | MZF1_1-4 (ZF)         |
| 19        | MZF1_5-13    | MA0057         | MZF1_5-13 (ZF)        |
| 20        | NF-kappaB    | MA0061         | REL GRP               |
| 20        | NFKB1        | MA0105         | REL GRP               |
| 20        | REL          | MA0101         | REL GRP               |
| 20        | RELA         | MA0107         | REL GRP               |
| 21        | Lhx3         | MA0134         | HOX GRP               |
| 21        | Lhx3_V2      | MA0135         | HOX GRP               |
| 21        | Nkx2-5       | MA0063         | HOX GRP               |
| 21        | Nobox        | MA0125         | HOX GRP               |
| 21        | Pdx1         | MA0132         | HOX GRP               |
| 22        | ESR1         | MA0112         | ESR1 (NR)             |
| 22        | PPARG        | MA0066         | PPARG (NR)            |
| 23        | Pax4         | MA0068         | PAX3 (HOX)            |
| 24        | RREB1        | MA0073         | RREB1 (ZF)            |
| 25        | RXRA-VDR     | MA0074         | RXRA-VDR (NR)         |
| 26        | Prrx2        | MA0075         | PRRX2 (HOX)           |
| 27        | Sox17        | MA0078         | SOX/HMG GRP           |
| 27        | Sox5         | MA0087         | SOX/HMG GRP           |
| 27        | SOX9         | MA0077         | SOX/HMG GRP           |
| 27        | SRY          | MA0084         | SOX/HMG GRP           |
| 28        | SP1          | MA0079         | SP1 (ZF)              |
| 29        | SRF          | MA0083         | SRF (MADS)            |
| 30        | Staf         | MA0088         | STAF (ZF)             |
| 31        | TEAD1        | MA0090         | TEAD1 (TEA)           |
| 32        | TAL1-TCF3    | MA0091         | TAL1 (HLH)            |
| 32        | YY1          | MA0095         | YY1 (ZF)              |
| 33        | Hand1-Tcfe2a | MA0092         | HAND1-TCFE2A (HLH)    |
| 34        | Fos          | MA0099         | FOS (LEUZIP)          |
| 35        | TP53         | MA0106         | TP53 (LSH)            |
| 36        | Spz1         | MA0111         | SPZ1 (HLH)            |
| 37        | Roaz         | MA0116         | ROAZ (ZF)             |
| 38        | TLX1-NFIC    | MA0119         | TLX1-NFIC (HOX-CCAAT) |
| 39        | Bapx1        | MA0122         | NKX/HOX GRP           |
| 39        | NKX2-2       | MA0506         | NKX/HOX GRP           |
| 39        | NKX2-5_V2    | MA0507         | NKX/HOX GRP           |
| 39        | NKX3-1       | MA0124         | NKX/HOX GRP           |
| 40        | ZNF354C      | MA0130         | ZNF354C (ZF)          |



**Table S15.** Vertebrate TF profile clustering and class label assignment (continued).

| Cluster # | Jaspar TFBS         | Jaspar TFBS ID | TFBS Class Label |
|-----------|---------------------|----------------|------------------|
| 41        | MIZF                | MA0131         | MIZF (ZF)        |
| 42        | REST                | MA0138         | REST (ZF)        |
| 43        | Pou2F1/Oct1         | MA0500         | POU2F1 (POU-HOX) |
| 44        | Egr1/Krox-24/NGFI-A | MA0501         | EGR/ZF GRP       |
| 44        | Egr2/Krox-20        | MA0502         | EGR/ZF GRP       |
| 44        | Egr3                | MA0503         | EGR/ZF GRP       |
| 44        | Egr4                | MA0504         | EGR/ZF GRP       |
| 45        | POU3F1/OCT6         | MA0505         | POU3F1 (POU-HOX) |
| 46        | CTCF_ren            | MA0508         | CTCF (ZF)        |
| 47        | Gli                 | MA0509         | GLI (ZF)         |

## Figures

Figure S1. Overview of methodology.

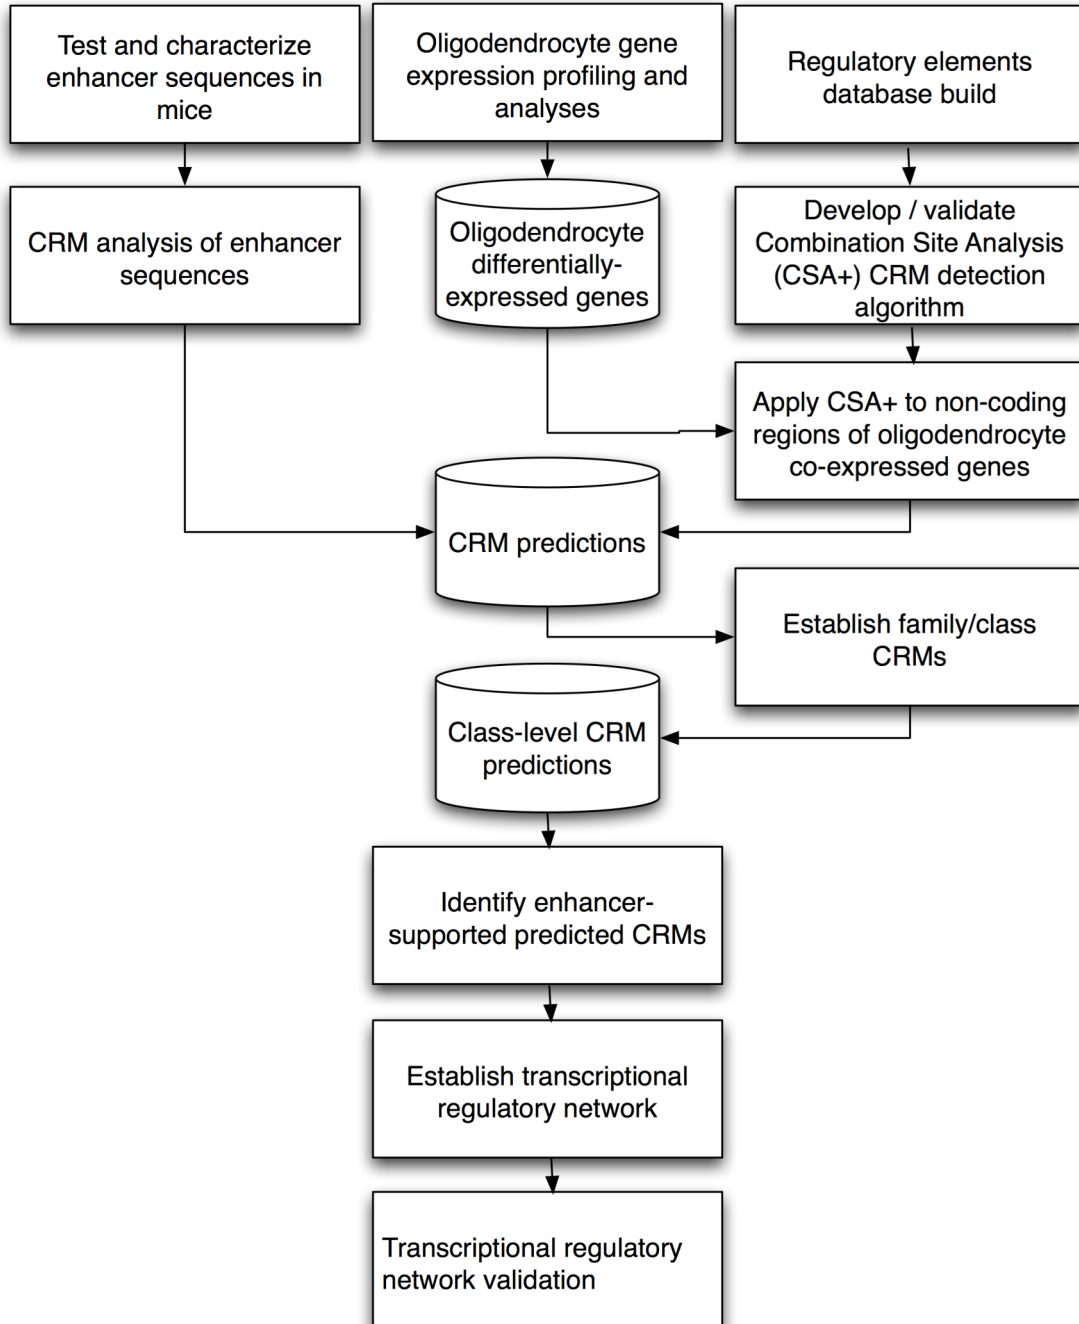

**Figure S2.** Genomic context for myelin gene-associated enhancer regions. Displayed using mouse MM8-mapped coordinates <http://genome.ucsc.edu>.

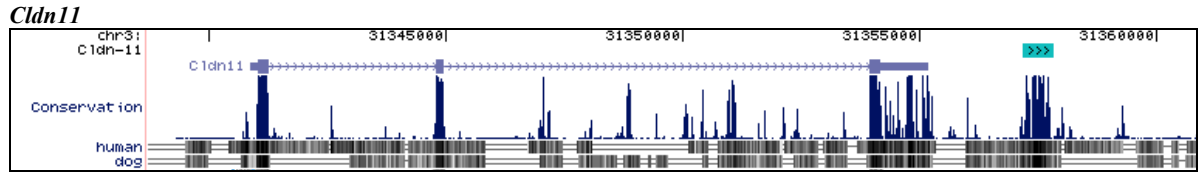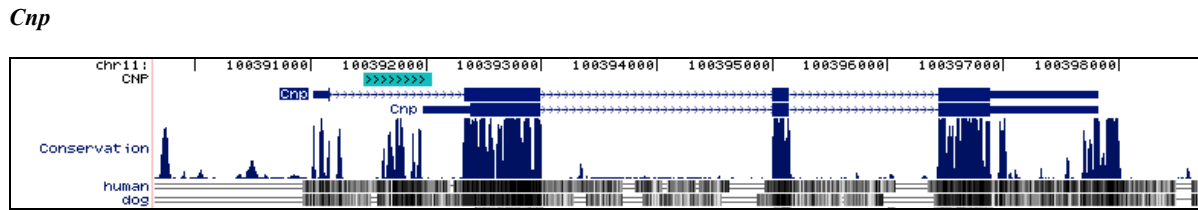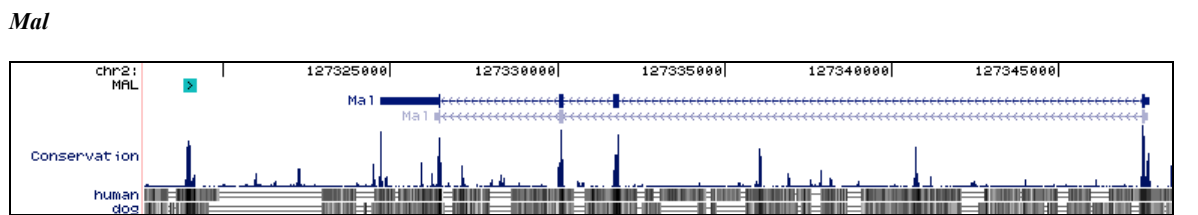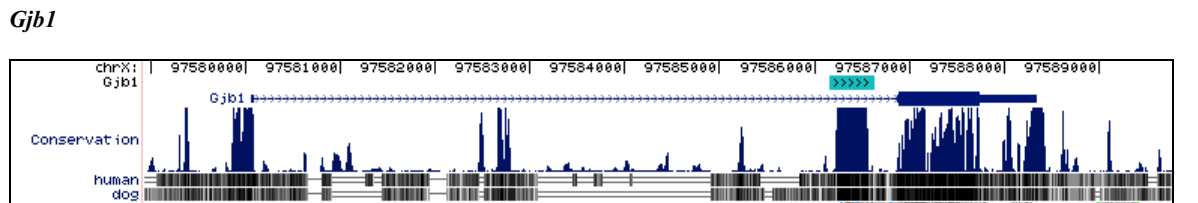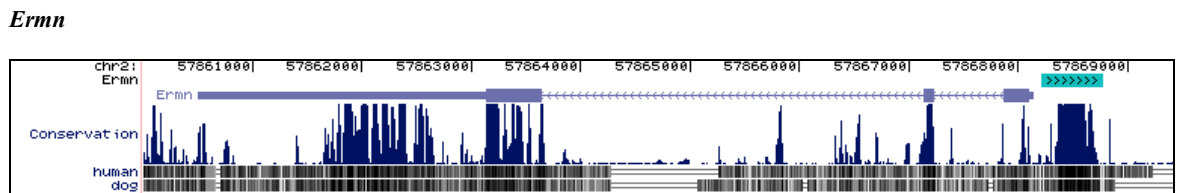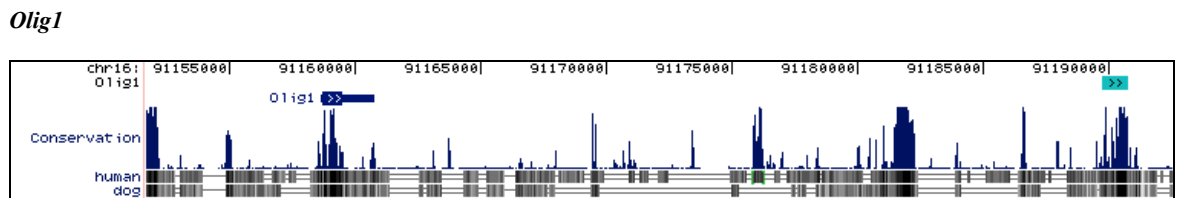

**Figure S2.** Genomic context for myelin gene-associated enhancer regions (continued).

*Olig2*

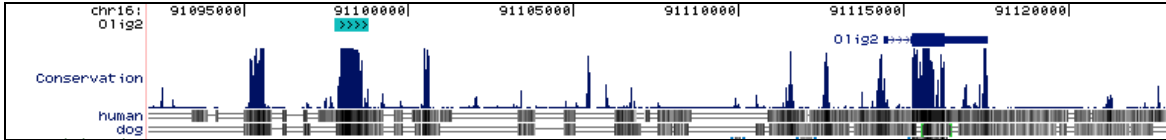

*Pou3f1*

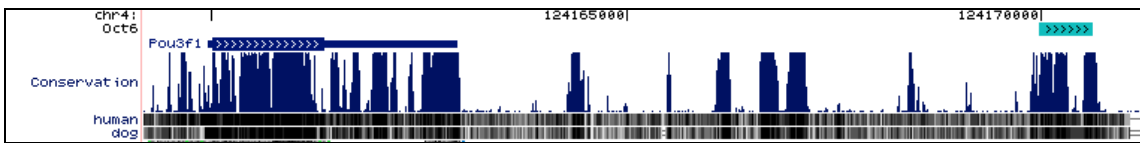

**Figure S3.** Logos of transcription factor binding site profiles added to the Jaspar database for the promoter analyses.

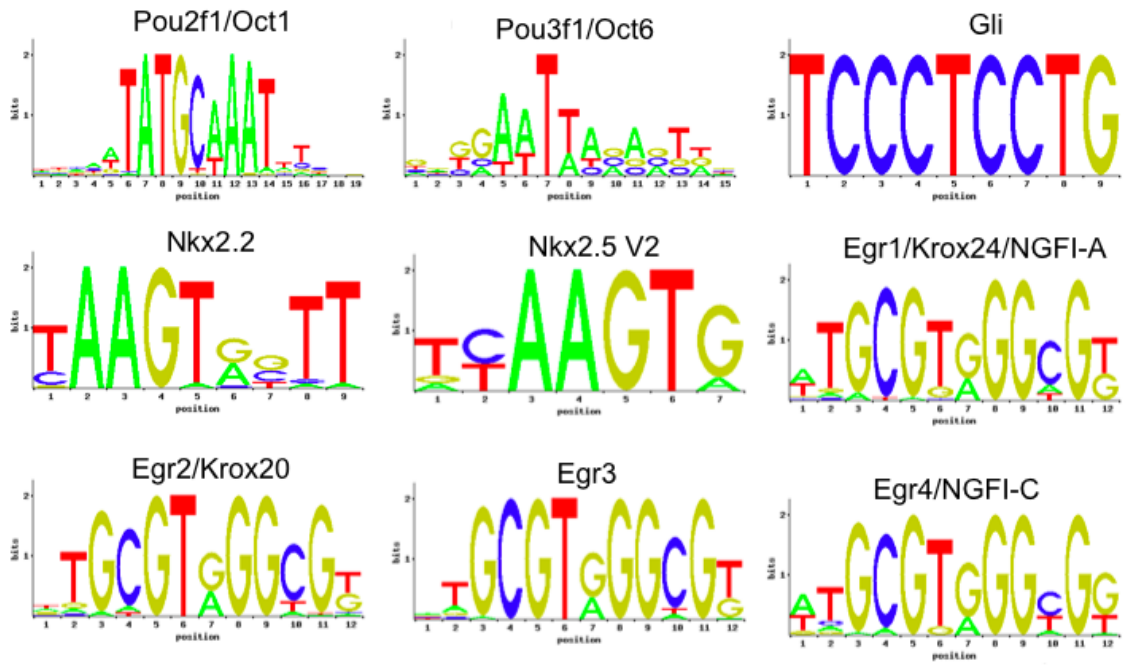

**Figure S4.** Reporter gene activity in spinal cord sections for *Cldn11*, *Gjb1*, *Pou3f1*, and *Mal* constructs.

Histochemical detection of  $\beta$ -galactosidase activity in spinal cord sections is shown for developmental timeframes (increasing ages are placed in successive rows): P5, P10, and mature (2 – 3 months old).

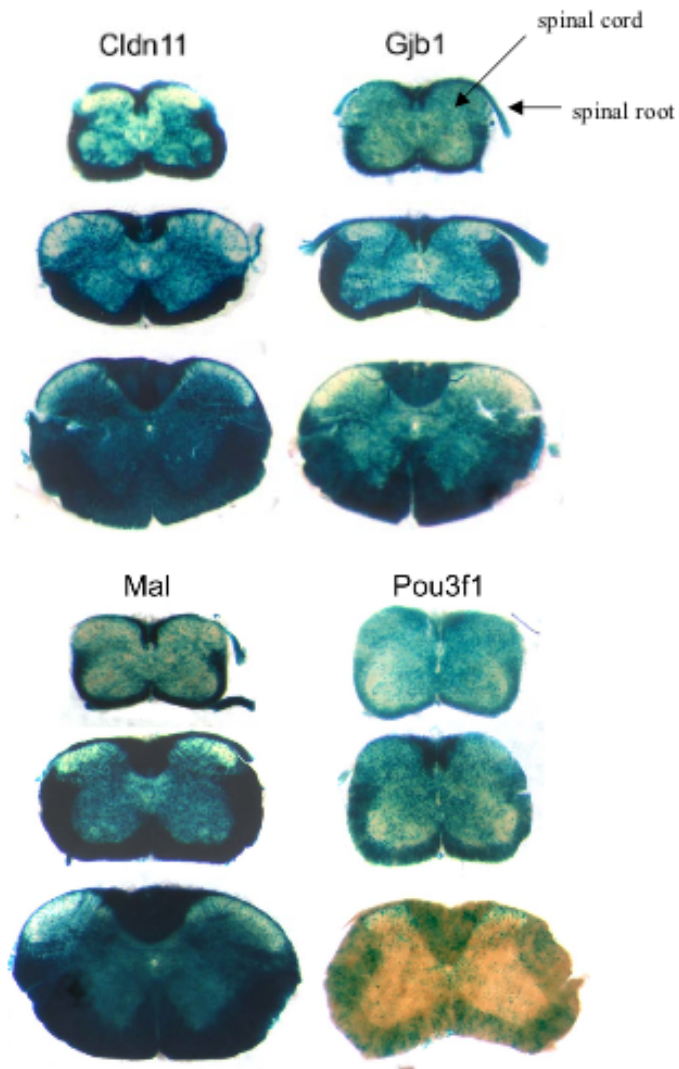

**Figure S5.** Wholemout staining of mouse spinal cords for pre-weaning and mature developmental stages.

Wholemout staining of mouse spinal cords for P5-P10 and adult (2 – 3 months) developmental stages. In the spinal cord, the *Cldn11* construct is expressed only in oligodendrocytes, while the *Gjb1*, *Mal* and *Pou3f1* constructs are expressed in oligodendrocytes and in Schwann cells of spinal roots.

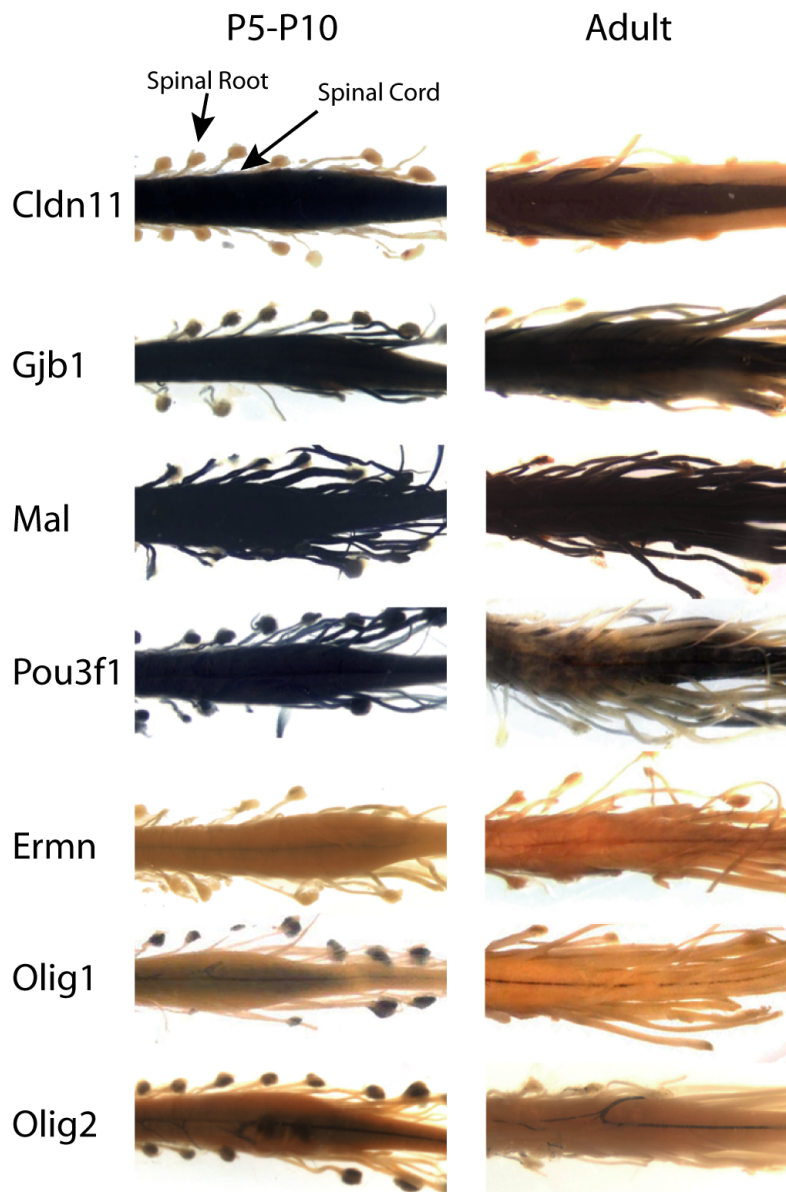

**Figure S6.** Reporter gene activity in whole brain sections for *Ernm*, *Olig1*, and *Olig2* constructs.

Histochemical detection of  $\beta$ -galactosidase activity in whole brain sections for reporter constructs with little to no staining in white matter at developmental timeframes (increasing ages are placed in successive rows): P5, P10, and mature (2 – 3 months old).

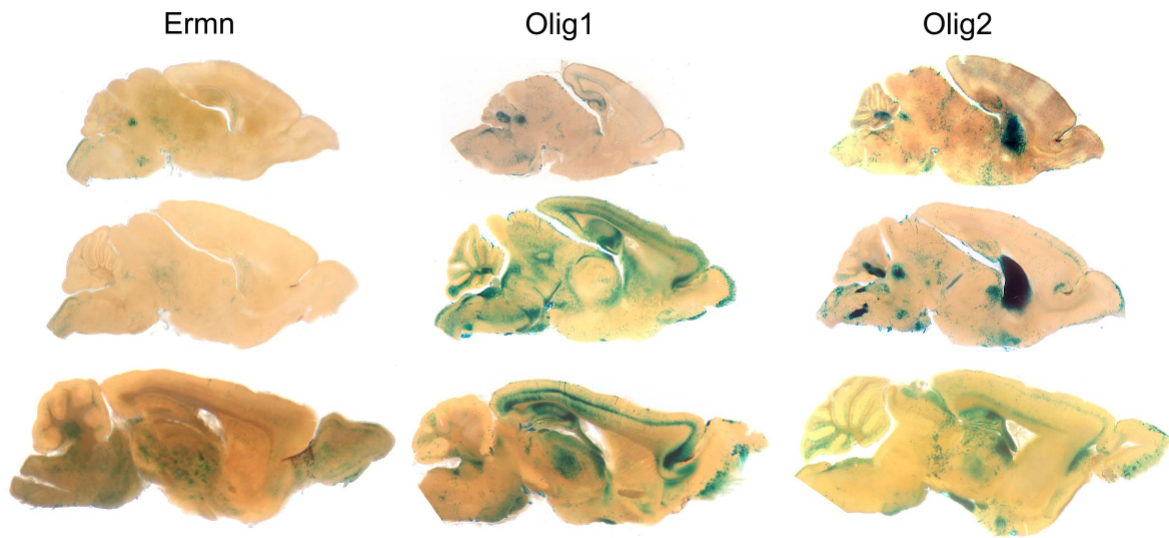



**Figure S7.** Reporter gene activity in spinal cord sections for *Ernm*, *Olig1*, and *Olig2* constructs.

Histochemical detection of  $\beta$ -galactosidase activity in spinal cord sections for reporter constructs with little to no staining in white matter at developmental timeframes (increasing ages are placed in successive rows): P5, P10, and mature (2 – 3 months old).

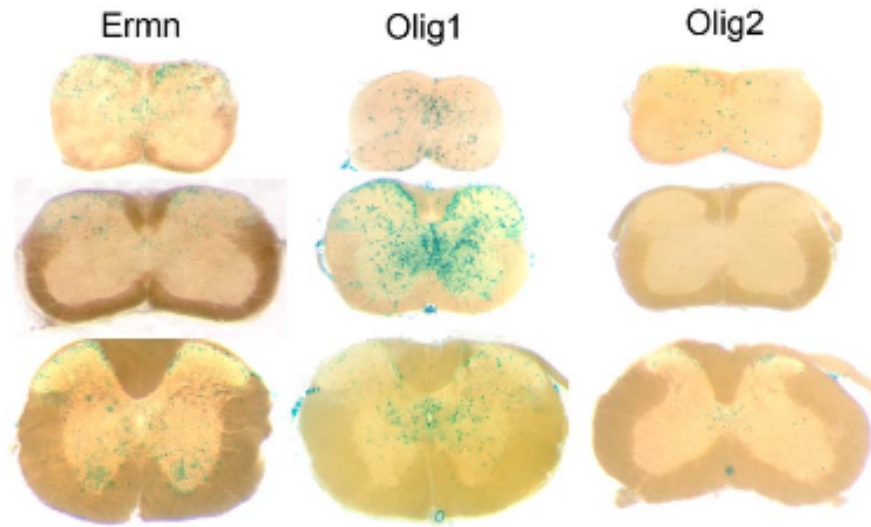

**Figure S8.** Characterization of cell populations expressing the *Gjb1*, *Cldn11*, *Pou3f1* and *Mal* constructs and MBP marker.

Images of brain sections (pons) stained for MBP (red) and GFP (green) by A. classical imaging and B. (below) confocal imaging depicts multiple co-labeled oligodendrocyte lineage cells that are expressed with the *Gjb1*, *Cldn11*, and *Pou3f1* transgenes (arrows).

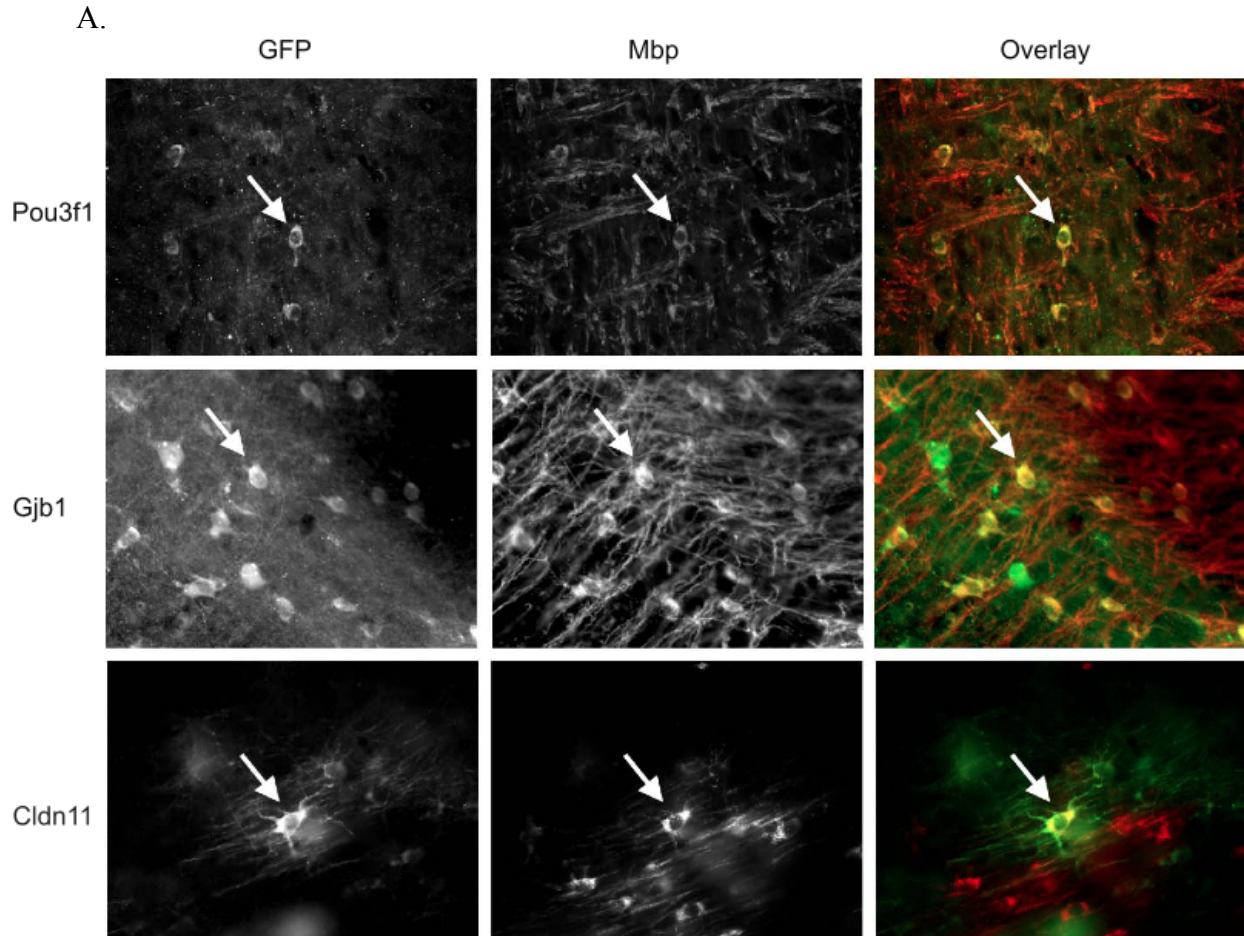

B.

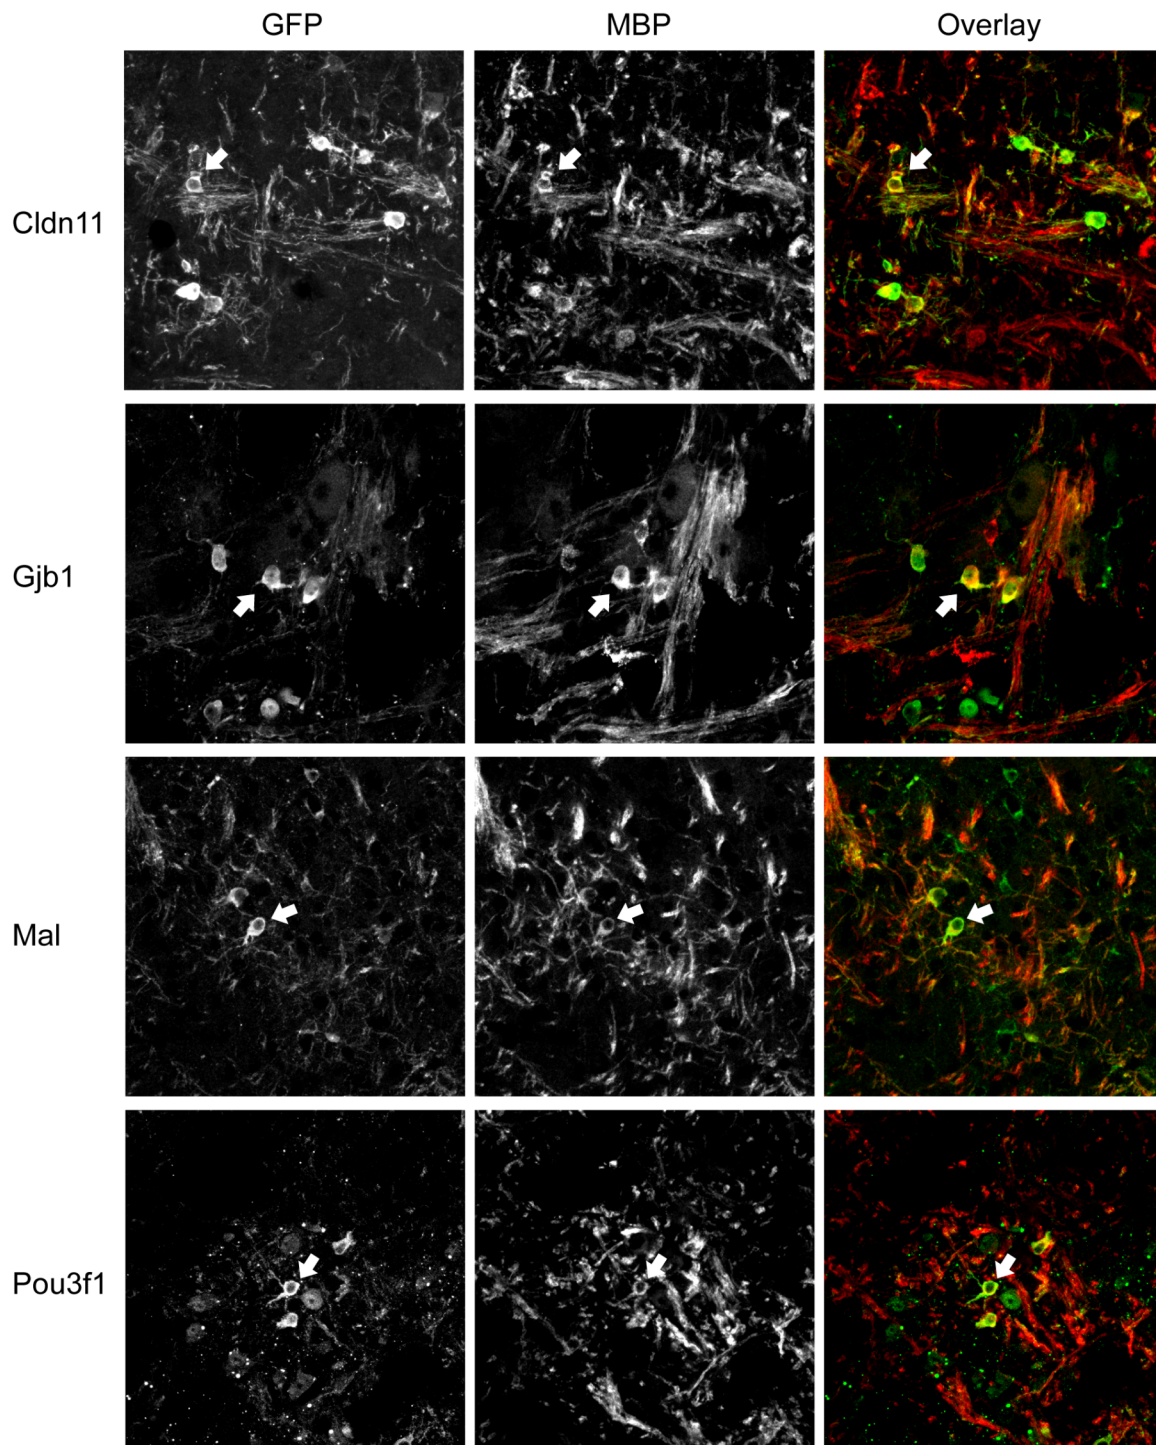



**Figure S9.** Characterization of cell populations expressing the *Gjb1*, *Cldn11*, *Pou3f1* and *Mal* constructs and PDGFRA marker.

Confocal microscopy images using P10 brain sections with GFP and PDGFRA antibodies. PDGFRA is a marker for oligodendrocyte progenitor cells. *Cldn11*, *Gjb1*, *Mal*, and *Pou3f1* constructs express in a fraction of cells expressing PDGFRA.

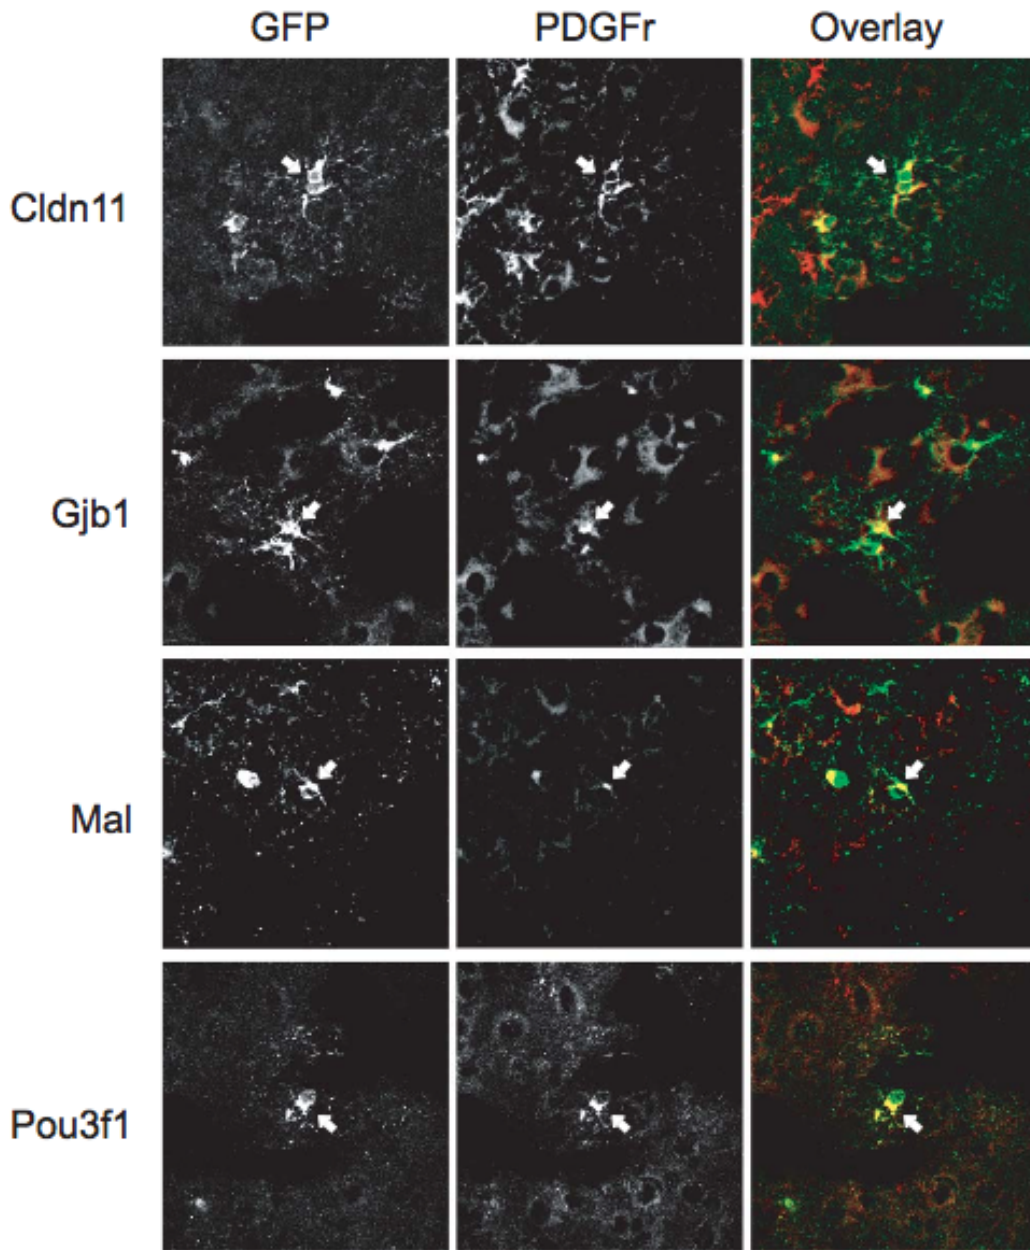

**Figure S10.** Evaluation of sequence conservation flanking transcription factor binding sites.

Human-mouse sequence conservation flanking an experimentally validated Ap1/Fos transcription factor binding site (using binding site information: AP1\_EXTRACTED50 extracted from the Annotated Binding Site database (5)).

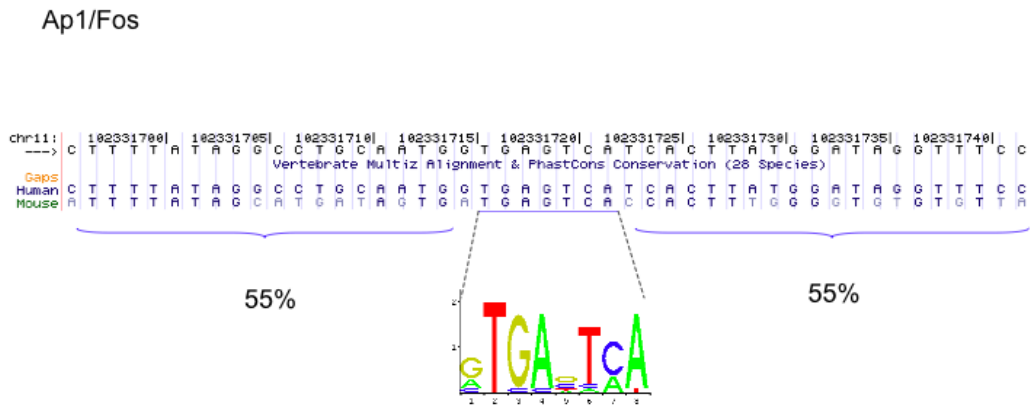

**Figure S11.** Myelin gene TRN model validation study 1.

Study: Li H, Lu Y, Smith HK, Richardson WD. Olig1 and Sox10 interact synergistically to drive myelin basic protein transcription in oligodendrocytes. *J Neurosci* 2007, 27(52):14375-14382.

Summary: The study demonstrated the activity and interaction of Olig (E-box binding) TFs with Sox TFs in the MBP gene non-coding sequence.

Analysis: The myelin TRN data tool was used to extract predicted CRMs for interactions with SOX5 TFBS (the *SOX5* binding site is similar to other Sox family member binding sites) in the *Mbp* upstream non-coding region examined by the study. We used the human orthologous region: chr18:72857989-72858227.

All Sox and E-box binding sites validated by the study were recovered in the CRM predictions (green bars in browser image below are predicted CRM TFBS and red asterisked TFBS were validated in Li *et al.* study). Additional TFBSs that may be bound by TFs known to regulate oligodendrocyte transcription (blue asterisks) were also predicted.

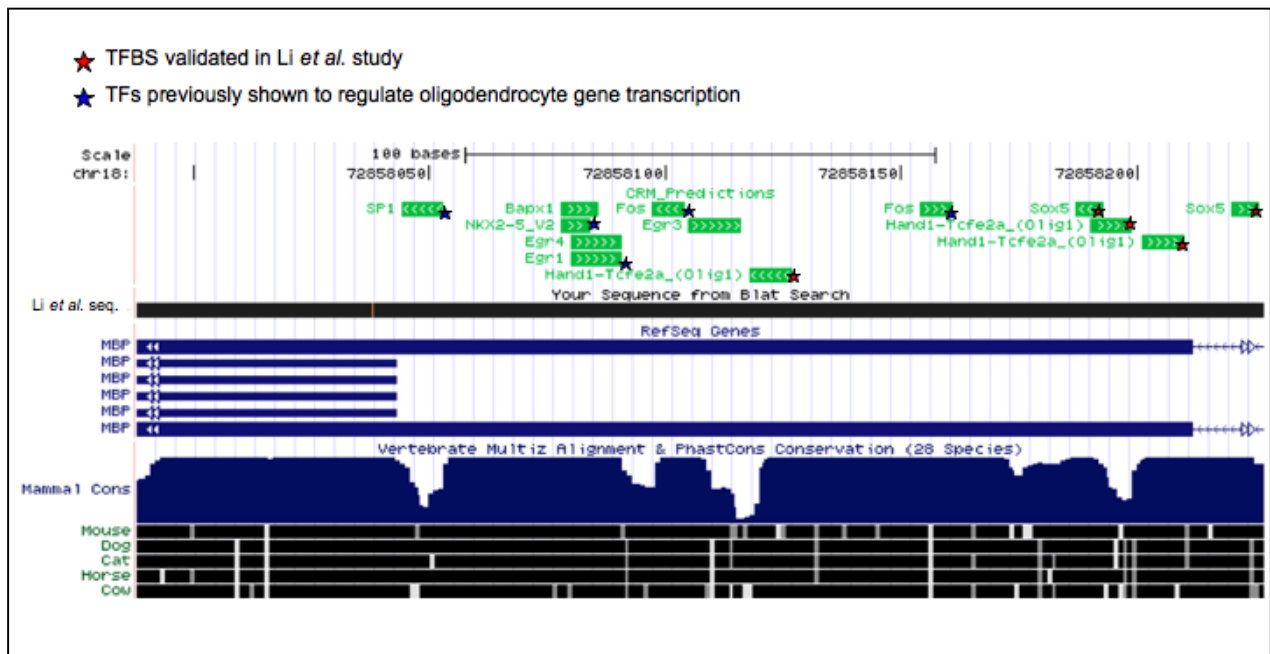

**Figure S12.** Myelin gene TRN model validation study 2.

Study: Gokhan S, Marin-Husstege M, Yung SY, Fontanez D, Casaccia-Bonnel P, Mehler MF: Combinatorial profiles of oligodendrocyte-selective classes of transcriptional regulators differentially modulate myelin basic protein gene expression. *J Neurosci* 25(36): 8311-8321.

Summary: Study explores the combinatorial effects of the canonical E-box binding TFs; OLIG1, OLIG2, ASCL1, SOX10 TFs and inhibitory bHLH TFs: ID2 and ID4 – bHLH TFs, which also bind E-boxes; and the NKX2-2 TF in transfection assays using an oligodendrocyte cell line.

Analysis: The myelin TRN data tool was used to extract all predicted CRMs in the *Mbp* upstream non-coding region examined by the study. We used the human orthologous region: chr18:72857970-72859290.

The extracted CRM predictions for this region (green bars in browser image below are predicted CRM TFBS) included TFBS capable of binding all TFs tested in the study (red asterisks). Additional TFBS that may be bound by TFs known to regulate oligodendrocyte transcription (blue asterisks) were also predicted.

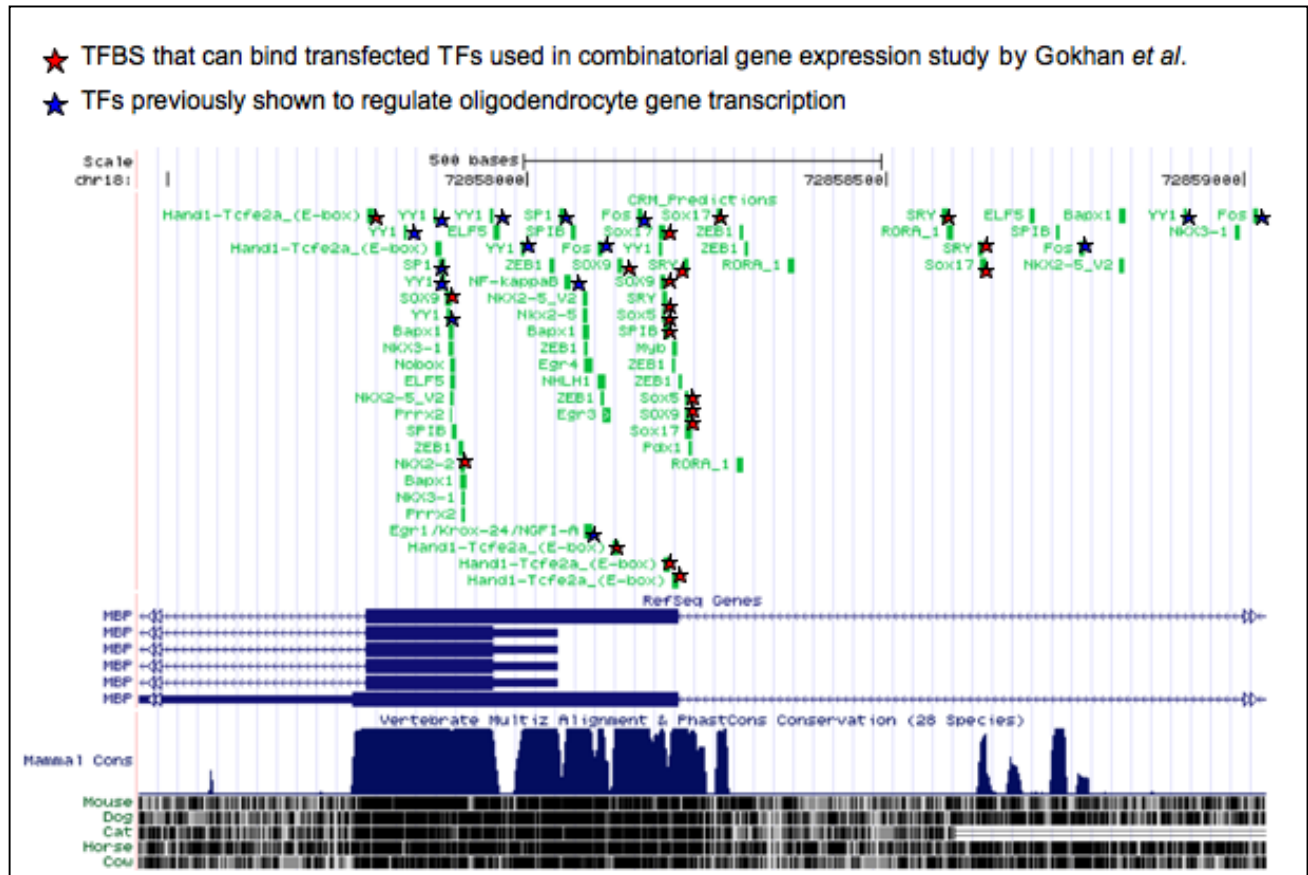

## Supplemental references

1. Morikawa, Y. and Cserjesi, P. (2004) Extra-embryonic vasculature development is regulated by the transcription factor HAND1. *Development*, **131**, 2195-2204.
2. Srivastava, D., Cserjesi, P. and Olson, E.N. (1995) A subclass of bHLH proteins required for cardiac morphogenesis. *Science*, **270**, 1995-1999.
3. Bounpheng, M.A., Morrish, T.A., Dodds, S.G. and Christy, B.A. (2000) Negative regulation of selected bHLH proteins by eHAND. *Exp. Cell Res*, **257**, 320-331.
4. Morin, S., Pozzulo, G., Robitaille, L., Cross, J. and Nemer, M. (2005) MEF2-dependent recruitment of the HAND1 transcription factor results in synergistic activation of target promoters. *J. Biol. Chem.*, **280**, 32272-32278.
5. Blanco, E., Farre, D., Alba, M.M., Messeguer, X. and Guigo, R. (2006) ABS: a database of Annotated regulatory Binding Sites from orthologous promoters. *Nucleic Acids Res.*, **34**, D63-67.
